# Supplementary material for: Feature Selection Combined with Neural Network Structure Optimization for HIV-1 Protease Cleavage Site Prediction
Source: Biomed Res Int. 2015 Apr 15;2015:263586. doi: 10.1155/2015/263586 (PMC4413510; doi:10.1155/2015/263586)
Supplement: Supplementary file 1 — The document covers the design of the feature selection method combined with neural network structure optimization. Meanwhile, this document contains the feature extraction of traditional orthogonal encoding features, PCA and NLF based features. Combination fusion and decision fusion method based on these features aim to get comprehensive feature representation and improve prediction performance are listed in the document. [file 263586.f1.zip]

Archive with 114 entries (102 files):
- Optional Supplementary Materials/
- Optional Supplementary Materials/classification code/
- Optional Supplementary Materials/classification code/4-1/
- Optional Supplementary Materials/classification code/4-1/Sites_Distribute_nlf.mat
- Optional Supplementary Materials/classification code/4-1/Sites_Distribute_oe.mat
- Optional Supplementary Materials/classification code/4-1/Sites_Distribute_pca.mat
- Optional Supplementary Materials/classification code/4-2/
- Optional Supplementary Materials/classification code/4-2/Sites_Distribute_nlf.mat
- Optional Supplementary Materials/classification code/4-2/Sites_Distribute_oe.mat
- Optional Supplementary Materials/classification code/4-2/Sites_Distribute_pca.mat
- Optional Supplementary Materials/classification code/4-3/
- Optional Supplementary Materials/classification code/4-3/Sites_Distribute_nlf.mat
- Optional Supplementary Materials/classification code/4-3/Sites_Distribute_oe.mat
- Optional Supplementary Materials/classification code/4-3/Sites_Distribute_pca.mat
- Optional Supplementary Materials/classification code/4-4/
- Optional Supplementary Materials/classification code/4-4/Sites_Distribute_nlf.mat
- Optional Supplementary Materials/classification code/4-4/Sites_Distribute_oe.mat
- Optional Supplementary Materials/classification code/4-4/Sites_Distribute_pca.mat
- Optional Supplementary Materials/classification code/amino_acid_compare.m
- Optional Supplementary Materials/classification code/Features.mat
- Optional Supplementary Materials/classification code/feature_fusion.m
- Optional Supplementary Materials/classification code/Label.mat
- Optional Supplementary Materials/classification code/Main.m
- Optional Supplementary Materials/classification code/Main1.m
- Optional Supplementary Materials/classification code/Main2.m
- Optional Supplementary Materials/classification code/Main3.m
- Optional Supplementary Materials/classification code/main4.m
- Optional Supplementary Materials/classification code/netInit.m
- Optional Supplementary Materials/classification code/new-constrict.txt
- Optional Supplementary Materials/classification code/nlf_final4_1.mat
- Optional Supplementary Materials/classification code/nlf_final4_2.mat
- Optional Supplementary Materials/classification code/nlf_final4_3.mat
- Optional Supplementary Materials/classification code/nlf_final4_4.mat
- Optional Supplementary Materials/classification code/nlf_final4_5.mat
- Optional Supplementary Materials/classification code/oe_final4_1.mat
- Optional Supplementary Materials/classification code/oe_final4_2.mat
- Optional Supplementary Materials/classification code/oe_final4_3.mat
- Optional Supplementary Materials/classification code/oe_final4_4.mat
- Optional Supplementary Materials/classification code/oe_final4_5.mat
- Optional Supplementary Materials/classification code/pca_final4_1.mat
- Optional Supplementary Materials/classification code/pca_final4_2.mat
- Optional Supplementary Materials/classification code/pca_final4_3.mat
- Optional Supplementary Materials/classification code/pca_final4_4.mat
- Optional Supplementary Materials/classification code/pca_final4_5.mat
- Optional Supplementary Materials/classification code/plotTickLatex2D.m
- Optional Supplementary Materials/classification code/plotTickLatex2DExample.m
- Optional Supplementary Materials/classification code/siteAnalyze.m
- Optional Supplementary Materials/classification code/Sites_Distribute_nlf.mat
- Optional Supplementary Materials/classification code/Sites_Distribute_oe.mat
- Optional Supplementary Materials/classification code/Sites_Distribute_pca.mat
- Optional Supplementary Materials/classification code/site_entropy.m
- Optional Supplementary Materials/classification code/test.m
- Optional Supplementary Materials/classification code/test1.m
- Optional Supplementary Materials/NLF Feature extraction code/
- Optional Supplementary Materials/NLF Feature extraction code/Compute_Correlation.m
- Optional Supplementary Materials/NLF Feature extraction code/Features.mat
- Optional Supplementary Materials/NLF Feature extraction code/Feature_Evaluation.m
- Optional Supplementary Materials/NLF Feature extraction code/Label.mat
- Optional Supplementary Materials/NLF Feature extraction code/Net_Train.m
- Optional Supplementary Materials/NLF Feature extraction code/nlf_final4_3.mat
- Optional Supplementary Materials/NLF Feature extraction code/nlf_fs_result4_3.mat
- Optional Supplementary Materials/NLF Feature extraction code/NN_FS_Main_Test.m
- Optional Supplementary Materials/NLF Feature extraction code/Sites_Collocate.m
- Optional Supplementary Materials/NLF Feature extraction code/╞Σ╦√╠╪╒≈╤í╘±╜ß╣√/
- Optional Supplementary Materials/NLF Feature extraction code/╞Σ╦√╠╪╒≈╤í╘±╜ß╣√/nlf_final4_1.mat
- Optional Supplementary Materials/NLF Feature extraction code/╞Σ╦√╠╪╒≈╤í╘±╜ß╣√/nlf_final4_2.mat
- Optional Supplementary Materials/NLF Feature extraction code/╞Σ╦√╠╪╒≈╤í╘±╜ß╣√/nlf_final4_4.mat
- Optional Supplementary Materials/NLF Feature extraction code/╞Σ╦√╠╪╒≈╤í╘±╜ß╣√/nlf_final4_5.mat
- Optional Supplementary Materials/NLF Feature extraction code/╞Σ╦√╠╪╒≈╤í╘±╜ß╣√/nlf_fs_result4_1.mat
- Optional Supplementary Materials/NLF Feature extraction code/╞Σ╦√╠╪╒≈╤í╘±╜ß╣√/nlf_fs_result4_2.mat
- Optional Supplementary Materials/NLF Feature extraction code/╞Σ╦√╠╪╒≈╤í╘±╜ß╣√/nlf_fs_result4_4.mat
- Optional Supplementary Materials/NLF Feature extraction code/╞Σ╦√╠╪╒≈╤í╘±╜ß╣√/nlf_fs_result4_5.mat
- Optional Supplementary Materials/NLF Feature extraction code/╦╡├≈.txt
- Optional Supplementary Materials/OE Feature extraction code/
- Optional Supplementary Materials/OE Feature extraction code/Compute_Correlation.m
- Optional Supplementary Materials/OE Feature extraction code/Features.mat
- Optional Supplementary Materials/OE Feature extraction code/Feature_Evaluation.m
- Optional Supplementary Materials/OE Feature extraction code/Label.mat
- Optional Supplementary Materials/OE Feature extraction code/Net_Train.m
- Optional Supplementary Materials/OE Feature extraction code/NN_FS_Main.m
- Optional Supplementary Materials/OE Feature extraction code/NN_FS_Main_Test.m
- Optional Supplementary Materials/OE Feature extraction code/oe_final4_1.mat
- Optional Supplementary Materials/OE Feature extraction code/result4_1.mat
- Optional Supplementary Materials/OE Feature extraction code/Sites_Collocate.m
- Optional Supplementary Materials/OE Feature extraction code/╞Σ╦√╠╪╒≈╤í╘±╜ß╣√/
- Optional Supplementary Materials/OE Feature extraction code/╞Σ╦√╠╪╒≈╤í╘±╜ß╣√/oe_final4_2.mat
- Optional Supplementary Materials/OE Feature extraction code/╞Σ╦√╠╪╒≈╤í╘±╜ß╣√/oe_final4_3.mat
- Optional Supplementary Materials/OE Feature extraction code/╞Σ╦√╠╪╒≈╤í╘±╜ß╣√/oe_final4_4.mat
- Optional Supplementary Materials/OE Feature extraction code/╞Σ╦√╠╪╒≈╤í╘±╜ß╣√/oe_final4_5.mat
- Optional Supplementary Materials/OE Feature extraction code/╞Σ╦√╠╪╒≈╤í╘±╜ß╣√/result4_2.mat
- Optional Supplementary Materials/OE Feature extraction code/╞Σ╦√╠╪╒≈╤í╘±╜ß╣√/result4_3.mat
- Optional Supplementary Materials/OE Feature extraction code/╞Σ╦√╠╪╒≈╤í╘±╜ß╣√/result4_4.mat
- Optional Supplementary Materials/OE Feature extraction code/╞Σ╦√╠╪╒≈╤í╘±╜ß╣√/result4_5.mat
- Optional Supplementary Materials/OE Feature extraction code/╦╡├≈.txt
- Optional Supplementary Materials/PCA Feature extraction code/
- Optional Supplementary Materials/PCA Feature extraction code/Compute_Correlation.m
- Optional Supplementary Materials/PCA Feature extraction code/Features.mat
- Optional Supplementary Materials/PCA Feature extraction code/Feature_Evaluation.m
- Optional Supplementary Materials/PCA Feature extraction code/Label.mat
- Optional Supplementary Materials/PCA Feature extraction code/Net_Train.m
- Optional Supplementary Materials/PCA Feature extraction code/NN_FS_Main_Test.m
- Optional Supplementary Materials/PCA Feature extraction code/pca_final4_4.mat
- Optional Supplementary Materials/PCA Feature extraction code/result4_4.mat
- Optional Supplementary Materials/PCA Feature extraction code/Sites_Collocate.m
- Optional Supplementary Materials/PCA Feature extraction code/╞Σ╦√╠╪╒≈╤í╘±╜ß╣√/
- Optional Supplementary Materials/PCA Feature extraction code/╞Σ╦√╠╪╒≈╤í╘±╜ß╣√/pca_final4_1.mat
- Optional Supplementary Materials/PCA Feature extraction code/╞Σ╦√╠╪╒≈╤í╘±╜ß╣√/pca_final4_2.mat
- Optional Supplementary Materials/PCA Feature extraction code/╞Σ╦√╠╪╒≈╤í╘±╜ß╣√/pca_final4_3.mat
- Optional Supplementary Materials/PCA Feature extraction code/╞Σ╦√╠╪╒≈╤í╘±╜ß╣√/pca_final4_5.mat
- Optional Supplementary Materials/PCA Feature extraction code/╞Σ╦√╠╪╒≈╤í╘±╜ß╣√/result4_1.mat
- Optional Supplementary Materials/PCA Feature extraction code/╞Σ╦√╠╪╒≈╤í╘±╜ß╣√/result4_2.mat
- Optional Supplementary Materials/PCA Feature extraction code/╞Σ╦√╠╪╒≈╤í╘±╜ß╣√/result4_3.mat
- Optional Supplementary Materials/PCA Feature extraction code/╞Σ╦√╠╪╒≈╤í╘±╜ß╣√/result4_5.mat
- Optional Supplementary Materials/PCA Feature extraction code/╦╡├≈.txt
