# Supplementary material for: Feature Selection Combined with Neural Network Structure Optimization for HIV-1 Protease Cleavage Site Prediction
Source: Biomed Res Int. 2015 Apr 15;2015:263586. doi: 10.1155/2015/263586 (PMC4413510; doi:10.1155/2015/263586)
Supplement: Supplementary file 1 — The document covers the design of the feature selection method combined with neural network structure optimization. Meanwhile, this document contains the feature extraction of traditional orthogonal encoding features, PCA and NLF based features. Combination fusion and decision fusion method based on these features aim to get comprehensive feature representation and improve prediction performance are listed in the document. [file 263586.f1.zip › Optional Supplementary Materials/classification code/amino_acid_compare.m]

%·Ö±ð¼ÆËãËùÓÐÑôÐÔÑù±¾ºÍÒõÐÔÑù±¾ÔÚp3£¬p2£¬p2'ºÍp3'ÉÏ¸÷ÖÖ°±»ùËáÀÛ¼Æ³öÏÖµÄ
%´ÎÊý£¬ÕÒ³ö×îÖØÒªµÄ°±»ùËá£¬²¢½«ÆäÓëÕý½»±àÂëÌØÕ÷Ñ¡Ôñºó·ÖÎöµÃµ½µÄ¸÷Î»µã
%°±»ùËáÖØÒªÐÔ½á¹û½øÐÐ±È½Ï¡£
%% Êý¾Ý´¦Àí
clc
clear all
Data_In = importdata('new-constrict.txt');
Data_Sequences = Data_In.textdata;
Label = Data_In.data;
Data = char(Data_Sequences);
amino_acid = 'ACDEFGHIKLMNPQRSTVWY';
index_positive = find(Label == 1);
index_negative = find(Label == 0);
data_positive = Data(index_positive,:);
data_negative = Data(index_negative,:);
%% ¼ÆËãÊýÖµ
[num_positive, ~] = size(data_positive);
[num_negative, ~] = size(data_negative);
positive_p3 = data_positive(:,2);
positive_p2 = data_positive(:,3);
positive_p2_1 = data_positive(:,6);
positive_p3_1 = data_positive(:,7);
negative_p3 = data_negative(:,2);
negative_p2 = data_negative(:,3);
negative_p2_1 = data_negative(:,6);
negative_p3_1 = data_negative(:,7);
temp = zeros(1,20);
%positive
for i = 1:num_positive
    for j= 1:20
        if positive_p3(i) == amino_acid(j)
            temp(j) = temp(j)+1;
        end
    end
end
positive_p3_sta = temp;

for i = 1:num_positive
    for j= 1:20
        if positive_p2(i) == amino_acid(j)
            temp(j) = temp(j)+1;
        end
    end
end
positive_p2_sta = temp;

for i = 1:num_positive
    for j= 1:20
        if positive_p2_1(i) == amino_acid(j)
            temp(j) = temp(j)+1;
        end
    end
end
positive_p2_1_sta = temp;

for i = 1:num_positive
    for j= 1:20
        if positive_p3_1(i) == amino_acid(j)
            temp(j) = temp(j)+1;
        end
    end
end
positive_p3_1_sta = temp;
%negative
for i = 1:num_negative
    for j= 1:20
        if negative_p3(i) == amino_acid(j)
            temp(j) = temp(j)+1;
        end
    end
end
negative_p3_sta = temp;

for i = 1:num_negative
    for j= 1:20
        if negative_p2(i) == amino_acid(j)
            temp(j) = temp(j)+1;
        end
    end
end
negative_p2_sta = temp;

for i = 1:num_negative
    for j= 1:20
        if negative_p2_1(i) == amino_acid(j)
            temp(j) = temp(j)+1;
        end
    end
end
negative_p2_1_sta = temp;

for i = 1:num_negative
    for j= 1:20
        if negative_p3_1(i) == amino_acid(j)
            temp(j) = temp(j)+1;
        end
    end
end
negative_p3_1_sta = temp;
%% ÕûÀíÅÅÐò×÷Í¼
%positive
[positive_p3_alt positive_p3_index] = sort(positive_p3_sta,'descend');
positive_p3_alt_sequence = char();
for i = 1:20
    positive_p3_alt_sequence(i) = amino_acid(positive_p3_index(i));
end
positive_p3_fs_sequence = 'CDFHIMPSTVWY';
positive_p3_fs_same_num = 0;
for i =1:length(positive_p3_fs_sequence)
    for j = 1:length(positive_p3_fs_sequence)
        if positive_p3_alt_sequence(i) == positive_p3_fs_sequence(j)
            positive_p3_fs_same_num = positive_p3_fs_same_num + 1;
        end
    end
end
positive_p3_fs_same_ratio = positive_p3_fs_same_num/length(positive_p3_fs_sequence);

[positive_p2_alt positive_p2_index] = sort(positive_p2_sta,'descend');
positive_p2_alt_sequence = char();
for i = 1:20
    positive_p2_alt_sequence(i) = amino_acid(positive_p2_index(i));
end
positive_p2_fs_sequence = 'ACEFGIKLNPQSTVWY';
positive_p2_fs_same_num = 0;
for i =1:length(positive_p2_fs_sequence)
    for j = 1:length(positive_p2_fs_sequence)
        if positive_p2_alt_sequence(i) == positive_p2_fs_sequence(j)
            positive_p2_fs_same_num = positive_p2_fs_same_num + 1;
        end
    end
end
positive_p2_fs_same_ratio = positive_p2_fs_same_num/length(positive_p2_fs_sequence);

[positive_p2_1_alt positive_p2_1_index] = sort(positive_p2_1_sta,'descend');
positive_p2_1_alt_sequence = char();
for i = 1:20
    positive_p2_1_alt_sequence(i) = amino_acid(positive_p2_1_index(i));
end
positive_p2_1_fs_sequence = 'CDEGHIKLMNPQRSTVW';
positive_p2_1_fs_same_num = 0;
for i =1:length(positive_p2_1_fs_sequence)
    for j = 1:length(positive_p2_1_fs_sequence)
        if positive_p2_1_alt_sequence(i) == positive_p2_1_fs_sequence(j)
            positive_p2_1_fs_same_num = positive_p2_1_fs_same_num + 1;
        end
    end
end
positive_p2_1_fs_same_ratio = positive_p2_1_fs_same_num/length(positive_p2_1_fs_sequence);

[positive_p3_1_alt positive_p3_1_index] = sort(positive_p3_1_sta,'descend');
positive_p3_1_alt_sequence = char();
for i = 1:20
    positive_p3_1_alt_sequence(i) = amino_acid(positive_p3_1_index(i));
end
positive_p3_1_fs_sequence = 'CEFHNPRTWY';
positive_p3_1_fs_same_num = 0;
for i =1:length(positive_p3_1_fs_sequence)
    for j = 1:length(positive_p3_1_fs_sequence)
        if positive_p3_1_alt_sequence(i) == positive_p3_1_fs_sequence(j)
            positive_p3_1_fs_same_num = positive_p3_1_fs_same_num + 1;
        end
    end
end
positive_p3_1_fs_same_ratio = positive_p3_1_fs_same_num/length(positive_p3_1_fs_sequence);
%negative
[negative_p3_alt negative_p3_index] = sort(negative_p3_sta,'descend');
negative_p3_alt_sequence = char();
for i = 1:20
    negative_p3_alt_sequence(i) = amino_acid(negative_p3_index(i));
end
negative_p3_fs_sequence = 'CDFHIMPSTVWY';
negative_p3_fs_same_num = 0;
for i =1:length(negative_p3_fs_sequence)
    for j = 1:length(negative_p3_fs_sequence)
        if negative_p3_alt_sequence(i) == negative_p3_fs_sequence(j)
            negative_p3_fs_same_num = negative_p3_fs_same_num + 1;
        end
    end
end
negative_p3_fs_same_ratio = negative_p3_fs_same_num/length(negative_p3_fs_sequence);

[negative_p2_alt negative_p2_index] = sort(negative_p2_sta,'descend');
negative_p2_alt_sequence = char();
for i = 1:20
    negative_p2_alt_sequence(i) = amino_acid(negative_p2_index(i));
end
negative_p2_fs_sequence = 'ACEFGIKLNPQSTVWY';
negative_p2_fs_same_num = 0;
for i =1:length(negative_p2_fs_sequence)
    for j = 1:length(negative_p2_fs_sequence)
        if negative_p2_alt_sequence(i) == negative_p2_fs_sequence(j)
            negative_p2_fs_same_num = negative_p2_fs_same_num + 1;
        end
    end
end
negative_p2_fs_same_ratio = negative_p2_fs_same_num/length(negative_p2_fs_sequence);

[negative_p2_1_alt negative_p2_1_index] = sort(negative_p2_1_sta,'descend');
negative_p2_1_alt_sequence = char();
for i = 1:20
    negative_p2_1_alt_sequence(i) = amino_acid(negative_p2_1_index(i));
end
negative_p2_1_fs_sequence = 'CDEGHIKLMNPQRSTVW';
negative_p2_1_fs_same_num = 0;
for i =1:length(negative_p2_1_fs_sequence)
    for j = 1:length(negative_p2_1_fs_sequence)
        if negative_p2_1_alt_sequence(i) == negative_p2_1_fs_sequence(j)
            negative_p2_1_fs_same_num = negative_p2_1_fs_same_num + 1;
        end
    end
end
negative_p2_1_fs_same_ratio = negative_p2_1_fs_same_num/length(negative_p2_1_fs_sequence);

[negative_p3_1_alt negative_p3_1_index] = sort(negative_p3_1_sta,'descend');
negative_p3_1_alt_sequence = char();
for i = 1:20
    negative_p3_1_alt_sequence(i) = amino_acid(negative_p3_1_index(i));
end
negative_p3_1_fs_sequence = 'CEFHNPRTWY';
negative_p3_1_fs_same_num = 0;
for i =1:length(negative_p3_1_fs_sequence)
    for j = 1:length(negative_p3_1_fs_sequence)
        if negative_p3_1_alt_sequence(i) == negative_p3_1_fs_sequence(j)
            negative_p3_1_fs_same_num = negative_p3_1_fs_same_num + 1;
        end
    end
end
negative_p3_1_fs_same_ratio = negative_p3_1_fs_same_num/length(negative_p3_1_fs_sequence);


%% ÒÔÉÏÊÇµ¥¸öÎ»µãµÄ±È½Ï£¬ÏÂÃæ½øÐÐ¶Ô³ÆÎ»ÖÃÎ»µãµÄ±È½Ï
%positive
positive_p3_bi = [positive_p3;positive_p3_1];
for i = 1:num_positive*2
    for j= 1:20
        if positive_p3_bi(i) == amino_acid(j)
            temp(j) = temp(j)+1;
        end
    end
end
positive_p3_bi_sta = temp;

positive_p2_bi = [positive_p2;positive_p2_1];
for i = 1:num_positive*2
    for j= 1:20
        if positive_p2_bi(i) == amino_acid(j)
            temp(j) = temp(j)+1;
        end
    end
end
positive_p2_bi_sta = temp;
%negative
negative_p3_bi = [negative_p3;negative_p3_1];
for i = 1:num_negative*2
    for j= 1:20
        if negative_p3_bi(i) == amino_acid(j)
            temp(j) = temp(j)+1;
        end
    end
end
negative_p3_bi_sta = temp;

negative_p2_bi = [negative_p2;negative_p2_1];
for i = 1:num_negative*2
    for j= 1:20
        if negative_p2_bi(i) == amino_acid(j)
            temp(j) = temp(j)+1;
        end
    end
end
negative_p2_bi_sta = temp;


%positive
[positive_p3_bi_alt positive_p3_bi_index] = sort(positive_p3_bi_sta,'descend');
positive_p3_bi_alt_sequence = char();
for i = 1:20
    positive_p3_bi_alt_sequence(i) = amino_acid(positive_p3_bi_index(i));
end
positive_p3_bi_fs_sequence = 'CFHPTWY';
positive_p3_bi_fs_same_num = 0;
for i =1:length(positive_p3_bi_fs_sequence)
    for j = 1:length(positive_p3_bi_fs_sequence)
        if positive_p3_bi_alt_sequence(i) == positive_p3_bi_fs_sequence(j)
            positive_p3_bi_fs_same_num = positive_p3_bi_fs_same_num + 1;
        end
    end
end
positive_p3_bi_fs_same_ratio = positive_p3_bi_fs_same_num/length(positive_p3_bi_fs_sequence);

[positive_p2_bi_alt positive_p2_bi_index] = sort(positive_p2_bi_sta,'descend');
positive_p2_bi_alt_sequence = char();
for i = 1:20
    positive_p2_bi_alt_sequence(i) = amino_acid(positive_p2_bi_index(i));
end
positive_p2_bi_fs_sequence = 'CEGIKLNPQSTVW';
positive_p2_bi_fs_same_num = 0;
for i =1:length(positive_p2_bi_fs_sequence)
    for j = 1:length(positive_p2_bi_fs_sequence)
        if positive_p2_bi_alt_sequence(i) == positive_p2_bi_fs_sequence(j)
            positive_p2_bi_fs_same_num = positive_p2_bi_fs_same_num + 1;
        end
    end
end
positive_p2_bi_fs_same_ratio = positive_p2_bi_fs_same_num/length(positive_p2_bi_fs_sequence);
%negative
[negative_p3_bi_alt negative_p3_bi_index] = sort(negative_p3_bi_sta,'descend');
negative_p3_bi_alt_sequence = char();
for i = 1:20
    negative_p3_bi_alt_sequence(i) = amino_acid(negative_p3_bi_index(i));
end
negative_p3_bi_fs_sequence = 'CFHPTWY';
negative_p3_bi_fs_same_num = 0;
for i =1:length(negative_p3_bi_fs_sequence)
    for j = 1:length(negative_p3_bi_fs_sequence)
        if negative_p3_bi_alt_sequence(i) == negative_p3_bi_fs_sequence(j)
            negative_p3_bi_fs_same_num = negative_p3_bi_fs_same_num + 1;
        end
    end
end
negative_p3_bi_fs_same_ratio = negative_p3_bi_fs_same_num/length(negative_p3_bi_fs_sequence);

[negative_p2_bi_alt negative_p2_bi_index] = sort(negative_p2_bi_sta,'descend');
negative_p2_bi_alt_sequence = char();
for i = 1:20
    negative_p2_bi_alt_sequence(i) = amino_acid(negative_p2_bi_index(i));
end
negative_p2_bi_fs_sequence = 'CEGIKLNPQSTVW';
negative_p2_bi_fs_same_num = 0;
for i =1:length(negative_p2_bi_fs_sequence)
    for j = 1:length(negative_p2_bi_fs_sequence)
        if negative_p2_bi_alt_sequence(i) == negative_p2_bi_fs_sequence(j)
            negative_p2_bi_fs_same_num = negative_p2_bi_fs_same_num + 1;
        end
    end
end
negative_p2_bi_fs_same_ratio = negative_p2_bi_fs_same_num/length(negative_p2_bi_fs_sequence);
