# Supplementary material for: Feature Selection Combined with Neural Network Structure Optimization for HIV-1 Protease Cleavage Site Prediction
Source: Biomed Res Int. 2015 Apr 15;2015:263586. doi: 10.1155/2015/263586 (PMC4413510; doi:10.1155/2015/263586)
Supplement: Supplementary file 1 — The document covers the design of the feature selection method combined with neural network structure optimization. Meanwhile, this document contains the feature extraction of traditional orthogonal encoding features, PCA and NLF based features. Combination fusion and decision fusion method based on these features aim to get comprehensive feature representation and improve prediction performance are listed in the document. [file 263586.f1.zip › Optional Supplementary Materials/classification code/main4.m]

tic;
%ÈýÖÖÌØÕ÷ÈÚºÏÍ¶Æ±£¬½µÎ¬Ç°ºó½á¹û±È½Ï
%¼ÆËãACC¡¢TPR¡¢SPEC¡¢ºÍMCCÒÔ¼°»æÖÆROCÇúÏß
clc
close all
clear all
% for j = 1:5
%% Êý¾Ý´¦Àí
load Features.mat
load Label.mat
load nlf_final4_5.mat
Data_Temp1 = data8';
Data_Tempp1 = mapminmax(Data_Temp1,0,1);
% Data1 = Data_Tempp1(Features_Chosen,:);
Data1 = Data_Tempp1;
n1= NodeNum_hide;
load oe_final4_4.mat
Data_Temp2 = data2';
Data_Tempp2 = mapminmax(Data_Temp2,0,1);
% Data2 = Data_Tempp2(Features_Chosen,:);
Data2 = Data_Tempp2;
n2 = NodeNum_hide;
load pca_final4_1.mat
Data_Temp3 = data9';
Data_Tempp3 = mapminmax(Data_Temp3,0,1);
% Data3 = Data_Tempp3(Features_Chosen,:);
Data3 = Data_Tempp3;
n3 = NodeNum_hide;
net_out = zeros(3,1922);%ËùÓÐÑù±¾×÷Îª²âÊÔÑù±¾ºóµÃµ½µÄÊä³ö
final_label = zeros(1,1922);%ËùÓÐÑù±¾×÷Îª²âÊÔÑù±¾ºó¸ù¾ÝÊä³öÖµÅÐ¶ÏµÃµ½Àà±ð
%=======================================================

indices = crossvalind('Kfold',Label,10);
cp = classperf(Label);
for i = 1:10
    fprintf(' %d th Classification\n ',i)
    Test_Indices = (indices == i);
    Train_Indices = ~Test_Indices;
    Data_Train1 = Data1(:,Train_Indices);
    Data_Test1 = Data1(:,Test_Indices);
    Label_Train = Label(Train_Indices);
    Label_Test = Label(Test_Indices);
    Data_Train2 = Data2(:,Train_Indices);
    Data_Test2 = Data2(:,Test_Indices);
    Data_Train3 = Data3(:,Train_Indices);
    Data_Test3 = Data3(:,Test_Indices);
    %         Error_Target = 0.05;
    %         x = 0;
    %         while x < 11
    %             x = x + 1;
    net1 = netInit(Data_Train1, Label_Train, n1);
    [net1, Train_Record, Label_Train_Out, Error] = train(net1,Data_Train1,Label_Train');
    
    [Label_Test_Out1,~,~,~,Test_Error] = sim(net1,Data_Test1,'','',Label_Test');
    Label_Test_Class1 = zeros(1,length(Label_Test));%¸ù¾ÝÉñ¾­ÍøÂçÊä³öÅÐ¶¨Àà±ð
    %ÒÀ¾ÝÊä³öµÄÕý¸ººÍ¾ø¶ÔÖµÅÐ¶ÏÀà±ð
    Label_Temp = Label_Test_Out1 >= 0.3;
    Label_Test_Class1(Label_Temp) = 1;
    Label_Temp = Label_Test_Out1 < 0.3;
    Label_Test_Class1(Label_Temp) = 0;
    net_out(1,Test_Indices) = Label_Test_Out1;
    
    net2 = netInit(Data_Train2, Label_Train, n2);
    [net2, Train_Record, Label_Train_Out, Error] = train(net2,Data_Train2,Label_Train');
    [Label_Test_Out2,~,~,~,Test_Error] = sim(net2,Data_Test2,'','',Label_Test');
    Label_Test_Class2 = zeros(1,length(Label_Test));%¸ù¾ÝÉñ¾­ÍøÂçÊä³öÅÐ¶¨Àà±ð
    %ÒÀ¾ÝÊä³öµÄÕý¸ººÍ¾ø¶ÔÖµÅÐ¶ÏÀà±ð
    Label_Temp = Label_Test_Out2 >= 0.3;
    Label_Test_Class2(Label_Temp) = 1;
    Label_Temp = Label_Test_Out2 < 0.3;
    Label_Test_Class2(Label_Temp) = 0;
    net_out(2,Test_Indices) = Label_Test_Out2;
    
    net3 = netInit(Data_Train3, Label_Train, n3);
    [net3, Train_Record, Label_Train_Out, Error] = train(net3,Data_Train3,Label_Train');
    [Label_Test_Out3,~,~,~,Test_Error] = sim(net3,Data_Test3,'','',Label_Test');
    Label_Test_Class3 = zeros(1,length(Label_Test));%¸ù¾ÝÉñ¾­ÍøÂçÊä³öÅÐ¶¨Àà±ð
    %ÒÀ¾ÝÊä³öµÄÕý¸ººÍ¾ø¶ÔÖµÅÐ¶ÏÀà±ð
    Label_Temp = Label_Test_Out3 >= 0.3;
    Label_Test_Class3(Label_Temp) = 1;
    Label_Temp = Label_Test_Out3 < 0.3;
    Label_Test_Class3(Label_Temp) = 0;
    net_out(3,Test_Indices) = Label_Test_Out3;
    
    Label_Class = [Label_Test_Class1;Label_Test_Class2;Label_Test_Class3];
    Label_Test_Class = zeros(1,length(Label_Test));
    %Í¶Æ±
    for p = 1:length(Label_Test)
        Temp = Label_Class(:,p);
        if length(find(Temp==1))>1
            Label_Test_Class(p) = 1;
        end
    end
    classperf(cp,Label_Test_Class,Test_Indices,'Positive',1,'Negative',0);
    get(cp);%ÏÔÊ¾Ã¿´Î½»²æÑéÖ¤µÄ·ÖÀàÐ§¹û
    %         net_out(Test_Indices) = Label_Test_Out;
    final_label(Test_Indices) = Label_Test_Class;
end
%¼ÆËã·ÖÀàÐ§¹û²ÎÊý
p(1,1) = sum( (Label'==1)&(final_label==1));
p(1,2) = sum( (Label'==0)&(final_label==1));
p(2,1) = sum( (Label'==1)&(final_label==0));
p(2,2) = sum( (Label'==0)&(final_label==0));
acc = (p(1,1)+p(2,2))/(p(1,1)+p(2,1)+p(2,2)+p(1,2))%ÕýÈ·ÂÊ
tpr = p(1,1)/(p(1,1)+p(2,1))%Ãô¸Ð¶È
spec = p(2,2)/(p(2,2)+p(1,2))%ÌØÒì¶È
mcc = (p(1,1)*p(2,2) - p(1,2)*p(2,1))/sqrt((p(1,1)+p(2,1))*(p(1,2)+p(2,2))*(p(1,1)+p(1,2))*(p(2,1)+p(2,2)))

for j=1:3
    [X,Y,T,AUC(j)] = perfcurve(Label,net_out(j,:),'1');
end
%     plotroc(Label', net_out)
% end
% plotroc(Label', final_label)
toc;
