# Supplementary material for: Feature Selection Combined with Neural Network Structure Optimization for HIV-1 Protease Cleavage Site Prediction
Source: Biomed Res Int. 2015 Apr 15;2015:263586. doi: 10.1155/2015/263586 (PMC4413510; doi:10.1155/2015/263586)
Supplement: Supplementary file 1 — The document covers the design of the feature selection method combined with neural network structure optimization. Meanwhile, this document contains the feature extraction of traditional orthogonal encoding features, PCA and NLF based features. Combination fusion and decision fusion method based on these features aim to get comprehensive feature representation and improve prediction performance are listed in the document. [file 263586.f1.zip › Optional Supplementary Materials/classification code/new-constrict.txt]

TQIMFETF 1

GQVNYEEF 1

PFIFEEEP 1

SFNFPQIT 1

DTVLEEMS 1

ARVLAEAM 1

AEELAEIF 1

SLNLRETN 1

ATIMMQRG 1

AECFRIFD 1

DQILIEIC 1

DDLFFEAD 1

YEEFVQMM 1

PIVGAETF 1

TLNFPISP 1

REAFRVFD 1

AETFYVDK 1

AQTFYVNL 1

PTLLTEAP 1

SFIGMESA 1

DAINTEFK 1

QITLWQRP 1

ELEFPEGG 1

SQNYPIVQ 1

PGNFLQSR 1

GDALLERN 1

KELYPLTS 1

RQANFLGK 1

SRSLYASS 1

RKILFLDG 1

GSHLVEAL 1

GGVYATRS 1

VEVAEEEE 1

LPVNGEFS 1

ETTALVCD 1

HLVEALYL 1

HYGFPTYG 1

DSADAEED 1

GWILGEHG 1

GWILAEHG 1

QAIYLALQ 1

EKVYLAWV 1

VEICTEME 1

TQDFWEVQ 1

LWMGYELH 1

GDAYFSVP 1

ELELAENR 1

SKDLIAEI 1

LEVNIVTD 1

GGNYPVQH 1

ARLMAEAL 1

PFAAAQQR 1

PRNFPVAQ 1

GLAAPQFS 1

SLNLPVAK 1

AETFYTDG 1

RQVLFLEK 1

QMIFEEHG 1

KVFGRCEL 0

VFGRCELA 0

FGRCELAA 0

GRCELAAA 0

RCELAAAM 0

CELAAAMK 0

ELAAAMKR 0

LAAAMKRH 0

AAAMKRHG 0

AAMKRHGL 0

AMKRHGLD 0

MKRHGLDN 0

KRHGLDNY 0

RHGLDNYR 0

HGLDNYRG 0

GLDNYRGY 0

LDNYRGYS 0

DNYRGYSL 0

NYRGYSLG 0

YRGYSLGN 0

RGYSLGNW 0

GYSLGNWV 0

YSLGNWVC 0

SLGNWVCA 0

LGNWVCAA 0

GNWVCAAK 0

NWVCAAKF 0

WVCAAKFE 0

VCAAKFES 0

CAAKFESN 0

AAKFESNF 0

AKFESNFN 0

KFESNFNT 0

FESNFNTQ 0

ESNFNTQA 0

SNFNTQAT 0

NFNTQATN 0

FNTQATNR 0

NTQATNRN 0

TQATNRNT 0

QATNRNTD 0

ATNRNTDG 0

TNRNTDGS 0

NRNTDGST 0

RNTDGSTD 0

NTDGSTDY 0

TDGSTDYG 0

DGSTDYGI 0

GSTDYGIL 0

STDYGILQ 0

TDYGILQI 0

DYGILQIN 0

YGILQINS 0

GILQINSR 0

ILQINSRW 0

LQINSRWW 0

QINSRWWC 0

INSRWWCN 0

NSRWWCND 0

SRWWCNDG 0

RWWCNDGR 0

WWCNDGRT 0

WCNDGRTP 0

CNDGRTPG 0

NDGRTPGS 0

DGRTPGSR 0

GRTPGSRN 0

RTPGSRNL 0

TPGSRNLC 0

PGSRNLCN 0

GSRNLCNI 0

SRNLCNIP 0

RNLCNIPC 0

NLCNIPCS 0

LCNIPCSA 0

CNIPCSAL 0

NIPCSALL 0

IPCSALLS 0

PCSALLSS 0

CSALLSSD 0

SALLSSDI 0

ALLSSDIT 0

LLSSDITA 0

LSSDITAS 0

SSDITASV 0

SDITASVN 0

DITASVNC 0

ITASVNCA 0

TASVNCAK 0

ASVNCAKK 0

SVNCAKKI 0

VNCAKKIV 0

NCAKKIVS 0

CAKKIVSD 0

AKKIVSDG 0

KKIVSDGN 0

KIVSDGNG 0

IVSDGNGM 0

VSDGNGMN 0

SDGNGMNA 0

DGNGMNAW 0

GNGMNAWV 0

NGMNAWVA 0

GMNAWVAW 0

MNAWVAWR 0

NAWVAWRN 0

AWVAWRNR 0

WVAWRNRC 0

VAWRNRCK 0

AWRNRCKG 0

WRNRCKGT 0

RNRCKGTD 0

NRCKGTDV 0

RCKGTDVQ 0

CKGTDVQA 0

KGTDVQAW 0

GTDVQAWI 0

TDVQAWIR 0

DVQAWIRG 0

VQAWIRGC 0

QAWIRGCR 0

AWIRGCRL 0

KETAAAKF 0

ETAAAKFE 0

TAAAKFER 0

AAAKFERQ 0

AAKFERQH 0

AKFERQHM 0

KFERQHMD 0

FERQHMDS 0

ERQHMDSS 0

RQHMDSST 0

QHMDSSTS 0

HMDSSTSA 0

MDSSTSAA 0

DSSTSAAS 0

SSTSAASS 0

STSAASSS 0

TSAASSSN 0

SAASSSNY 0

AASSSNYC 0

ASSSNYCN 0

SSSNYCNQ 0

SSNYCNQM 0

SNYCNQMM 0

NYCNQMMK 0

YCNQMMKS 0

CNQMMKSR 0

NQMMKSRN 0

QMMKSRNL 0

MMKSRNLT 0

MKSRNLTK 0

KSRNLTKD 0

SRNLTKDR 0

RNLTKDRC 0

NLTKDRCK 0

LTKDRCKP 0

TKDRCKPV 0

KDRCKPVN 0

DRCKPVNT 0

RCKPVNTF 0

CKPVNTFV 0

KPVNTFVH 0

PVNTFVHE 0

VNTFVHES 0

NTFVHESL 0

TFVHESLA 0

FVHESLAD 0

VHESLADV 0

HESLADVQ 0

ESLADVQA 0

SLADVQAV 0

LADVQAVC 0

ADVQAVCS 0

DVQAVCSQ 0

VQAVCSQK 0

QAVCSQKN 0

AVCSQKNV 0

VCSQKNVA 0

CSQKNVAC 0

SQKNVACK 0

QKNVACKN 0

KNVACKNG 0

NVACKNGQ 0

VACKNGQT 0

ACKNGQTN 0

CKNGQTNC 0

KNGQTNCY 0

NGQTNCYQ 0

GQTNCYQS 0

QTNCYQSY 0

TNCYQSYS 0

NCYQSYST 0

CYQSYSTM 0

YQSYSTMS 0

QSYSTMSI 0

SYSTMSIT 0

YSTMSITD 0

STMSITDC 0

TMSITDCR 0

MSITDCRE 0

SITDCRET 0

ITDCRETG 0

TDCRETGS 0

DCRETGSS 0

CRETGSSK 0

RETGSSKY 0

ETGSSKYP 0

TGSSKYPN 0

GSSKYPNC 0

SSKYPNCA 0

SKYPNCAY 0

KYPNCAYK 0

YPNCAYKT 0

PNCAYKTT 0

NCAYKTTQ 0

CAYKTTQA 0

AYKTTQAN 0

YKTTQANK 0

KTTQANKH 0

TTQANKHI 0

TQANKHII 0

QANKHIIV 0

ANKHIIVA 0

NKHIIVAC 0

KHIIVACE 0

HIIVACEG 0

IIVACEGN 0

IVACEGNP 0

VACEGNPY 0

ACEGNPYV 0

CEGNPYVP 0

EGNPYVPV 0

GNPYVPVH 0

NPYVPVHF 0

PYVPVHFD 0

YVPVHFDA 0

VPVHFDAS 0

PVHFDASV 0

SQKYPIVQ 0

SQQYPIVQ 0

SQNSPIVQ 0

SQNPPIVQ 0

SQNYPKVQ 0

SQNYAIVQ 0

SQNYDIVQ 0

SQNYKIVQ 0

TQNYPIVQ 1

SNNYPIVQ 1

SKNYPIVQ 1

SQNFPIVQ 1

SQNYLIVQ 1

SQNYTIVQ 1

SQNYPIIQ 1

SQNYPIEQ 1

SQNYPIVP 1

SQNYPIVE 1

TFNFPQIT 1

YFNFPQIT 1

SCNFPQIT 1

SYNFPQIT 1

SFTFPQIT 1

SFYFPQIT 1

SFNSPQIT 1

SFNYPQIT 1

SFNFGQIT 1

SFNFLQIT 1

SFNFPPIT 1

SFNFPLIT 1

SFNFPQVT 1

SFNFPQDT 1

SFNFPQII 1

SQNYPAVQ 1

SQNYPNVQ 1

SQNYPLVQ 1

SQNYPVVQ 1

SQNYPILQ 1

SQNYPIFQ 1

SQLYPIVQ 1

SQCYPIVQ 1

SQAYPIVQ 1

SQNMPIVQ 1

ARVLFEAL 1

ARVLFQAL 1

ARVLFIAL 1

ARVLFVAL 1

ARVLFAAL 1

ARVLFDAL 1

ARVLFNAL 1

ARVLFTAL 1

ARNLFEAL 1

ARNLFQAL 1

ARNLFIAL 1

ARNLFVAL 1

ARVYPEAL 1

ARNYPEAL 1

SQNYPIVL 1

ARNYPIVL 1

AQNYPIVL 1

RQNYPIAL 1

AIQEQHFA 0

ALTNAVLV 0

AMVNQALV 0

DAIQEQHF 0

DRQAGFLG 0

EAMSQVTN 0

ERQANFLG 0

ESFRSGVE 0

FVNNGLVK 0

GALTNAVL 0

GAMVNQAL 0

GLTMVTQL 0

GSGALTNA 0

GSGAMVNQ 0

GSGLTMVT 0

GSGTWMVH 0

GTWMVHSL 0

GVFVNNGL 0

GVNVVNGK 0

GVQVVNGK 0

IQEQHFAD 0

KGSGALTN 0

KGSGAMVN 0

KGSGTWMV 0

KKLVVQPK 0

KSGSGLTM 0

KSGVFVNN 0

KSGVNVVN 0

KSGVQVVN 0

KSRVNVVN 0

KSRVQVVN 0

KTKKLVVQ 0

KTKVKVVQ 0

KTKVLKVQ 0

KVKVVQPK 0

KVLKVQPK 0

LAEAMSQV 0

LTMVTQLV 0

LTNAVLVP 0

MVHSLVPK 0

MVNQALVP 0

MVTQLVPK 0

QAGFLGLG 0

QANFLGKI 0

QVIPYNQS 0

RQAGFLGL 0

RSGVETTT 0

RVNVVNGK 0

RVQVVNGK 0

SDGYYGDS 0

SFRSGVET 0

SGALTNAV 0

SGAMVNQA 0

SGLTMVTQ 0

SGSGLTMV 0

SGTWMVHS 0

SGVFVNNG 0

SGVNVVNG 0

SGVQVVNG 0

SPNYPIVQ 0

SQGYPIVQ 0

SQHYPIVQ 0

SQMYPIVQ 0

SQNAPIVQ 0

SQNCPIVQ 0

SQNDPIVQ 0

SQNEPIVQ 0

SQNGPIVQ 0

SQNHPIVQ 0

SQNIPIVQ 0

SQNKPIVQ 0

SQNNPIVQ 0

SQNPYIVQ 0

SQNQPIVQ 0

SQNRPIVQ 0

SQNTPIVQ 0

SQNVPIVQ 0

SQNYEIVQ 0

SQNYGIVQ 0

SQNYHIVQ 0

SQNYNIVQ 0

SQNYPFVQ 0

SQNYPGVQ 0

SQNYPWVQ 0

SQNYQIVQ 0

SQNYRIVQ 0

SQPYPIVQ 0

SQRYPIVQ 0

SQWYPIVQ 0

SQYYPIVQ 0

SRVNVVNG 0

SRVQVVNG 0

TERQANFL 0

TKKLVVQP 0

TKVKVVQP 0

TKVLKVQP 0

TMVTQLVP 0

TNAVLVPK 0

TWMVHSLV 0

VFVNNGLV 0

VIPYNQSV 0

VLAEAMSQ 0

VNQALVPK 0

VSQNPYIV 0

WMVHSLVP 0

AETFYVDG 1

AKVLVVQP 1

AQNYPIVQ 1

ARLMMEAL 1

ATAMMATA 1

ATIMMITA 1

ATIYYITA 1

DKVLVVQP 1

DQNYPIVQ 1

ENNFFVTI 1

ENNFLVTI 1

ENNFYVTI 1

ENNLAVTI 1

ENNLFVTI 1

ENNLYVTI 1

ENNMAVTI 1

ENNMYVTI 1

ENVFFNGD 1

ENVFLNGD 1

ENVFYNGD 1

ENVLFNGD 1

ENVMFNGD 1

ENVMMNGD 1

FAVSLAMT 1

GAVSLAMT 1

GAVWLAMT 1

GEMFFPVL 1

GFAMAEAL 1

GFIGVSYL 1

GKVLVVQP 1

GLNMPALV 1

GLTMVQEL 1

GLVAFANL 1

GLVLQEGL 1

GQANFLGK 1

GQDFPMYL 1

GQNYPIVQ 1

GQVNFLGK 1

GWVMTEAL 1

HAVSLAMT 1

HDVYVRKA 1

HEVYVRKA 1

HNVYVRKA 1

HQVYVRKA 1

HRVYVRKA 1

HVVYVRKA 1

HYVYVRKA 1

KQNYPIVQ 1

LAVSLAMT 1

LKVLVVQP 1

LQNYPIVQ 1

MQNYPIVQ 1

NAVSLAMT 1

NQNYPIVQ 1

NSVMIALV 1

PAASFAMT 1

PAASLAMT 1

PAAWLAMT 1

PAGSFAMT 1

PAGSLAMT 1

PAGWLAMT 1

PAHSFAMT 1

PAHSLAMT 1

PAHWLAMT 1

PALSFAMT 1

PALSLAMT 1

PALWLAMT 1

PASSLAMT 1

PAVALAMT 1

PAVELAMT 1

PAVGLAMT 1

PAVHLAMT 1

PAVIFAMT 1

PAVILAMT 1

PAVLAAMT 1

PAVLFAMT 1

PAVLGAMT 1

PAVLLAMT 1

PAVRLAMT 1

PAVSAAMT 1

PAVSEAMT 1

PAVSFAMT 1

PAVSGAMT 1

PAVSLALT 1

PAVSLAMT 1

PAVSLANT 1

PAVSLAYT 1

PAVSLGMT 1

PAVSLLMT 1

PAVSLSMT 1

PAVSQAMT 1

PAVSRAMT 1

PAVSVAMT 1

PAVVLAMT 1

PAVWAAMT 1

PAVWFAMT 1

PAVWGAMT 1

PAVWLAMT 1

PAVWVAMT 1

PAWSLAMT 1

PDVSLAMT 1

PFVSLAMT 1

PFVWLAMT 1

PGNFFQSR 1

PGNFPQSR 1

PGNFVQSR 1

PGNLLQSR 1

PGNYLQSR 1

PGVSLAMT 1

PGVSLHMT 1

PGVWLAMT 1

PGLSLAMT 1

PHVSLAMT 1

PHVWLAMT 1

PKVLVVQP 1

PNVSLAMT 1

PPVSLAMT 1

PQNFLQSR 1

PQNYPIVQ 1

PRASLAMT 1

PRGSLAMT 1

PRHSLAMT 1

PRLSLAMT 1

PRNFLQSR 1

PRVALAMT 1

PRVGLAMT 1

PRVLLAMT 1

PRVSLAMT 1

PRVWLAMT 1

PSVSLAMT 1

PSVWLAMT 1

PTVSLAMT 1

PTVWLAMT 1

QGNFLQSR 1

RKVLFLDG 1

RQVNFLGK 1

RRANFLGK 1

RRVNFLGK 1

SANYPIVQ 1

SCNYPIVQ 1

SDAYYADS 1

SDAYYTDS 1

SDCYYCDS 1

SDCYYTDS 1

SDEYYEDS 1

SDEYYTDS 1

SDGYYTDS 1

SDIYYTDS 1

SDLYYTDS 1

SDNYPIVQ 1

SDTYYADS 1

SDTYYCDS 1

SDTYYEDS 1

SDTYYGDS 1

SDTYYIDS 1

SDTYYLDS 1

SDTYYTDQ 1

SDTYYTDS 1

SDTYYTFS 1

SDTYYTGS 1

SDTYYTLS 1

SDTYYTQS 1

SENYPIVQ 1

SFNSRQIT 1

SFNYPIVQ 1

SFTYYTDS 1

SFVFVVNG 1

SGAFMTRG 1

SGAYLIQG 1

SGIFLETS 1

SGIFVVNG 1

SGIMFESN 1

SGIMFQSA 1

SGINFESG 1

SGIYLVEN 1

SGIYTVQS 1

SGIYYSVS 1

SGLFTEYG 1

SGLMEVSK 1

SGLYYVTE 1

SGMWFEAP 1

SGNFAAFS 1

SGNFVVNG 1

SGNMLVYS 1

SGNMVMFG 1

SGNYFVET 1

SGNYFVQG 1

SGNYLVTS 1

SGNYPIVQ 1

SGSYVEYQ 1

SGTFQVQL 1

SGTYYTDS 1

SGTYYTGS 1

SGVFAVTQ 1

SGVFHVNG 1

SGVFQVNG 1

SGVFTEER 1

SGVFVEMP 1

SGVFVENG 1

SGVFVETS 1

SGVFVQNG 1

SGVFVVNG 1

SGVFVVQG 1

SGVFVVTG 1

SGVFYSRE 1

SGVHFISR 1

SGVHVEYT 1

SGVLFVSS 1

SGVLMLRT 1

SGVMFQTD 1

SGVMPTMS 1

SGVYHVST 1

SGVYLATD 1

SGYLEVSS 1

SGYVVVSN 1

SHNYPIVQ 1

SINYPIVQ 1

SKVLVVQP 1

SLNYPIVQ 1

SLTYYTDS 1

SMNYPIVQ 1

SQDYPIVQ 1

SQEYPIVQ 1

SQNLPIVQ 1

SQNWPIVQ 1

SQNYCIVQ 1

SQNYFIVQ 1

SQNYIIVQ 1

SQNYMIVQ 1

SQNYPIDQ 1

SQNYPTVQ 1

SQNYSIVQ 1

SQNYVIVQ 1

SQNYWIVQ 1

SQNYYIDQ 1

SQNYYIVQ 1

SQNYYNQS 1

SQNYYTDQ 1

SQNYYTVQ 1

SQSYPIVQ 1

SQTYYIDQ 1

SQTYYIVQ 1

SQTYYTDQ 1

SQTYYTDS 1

SQTYYTQS 1

SQTYYTVQ 1

SQVYPIVQ 1

SRNYPIVQ 1

SSNYPIVQ 1

STNYPIVQ 1

SWNYPIVQ 1

SYNYPIVQ 1

TAVLVVQP 1

TDVLVVQP 1

TFVLVVQP 1

TGVLVVQP 1

TKALVVQP 1

TKDLVVQP 1

TKFLVVQP 1

TKILVVQP 1

TKLLVVQP 1

TKNLVVQP 1

TKVAVVQP 1

TKVFVVQP 1

TKVGVVQP 1

TKVLFVQP 1

TKVLIVQP 1

TKVLLVQP 1

TKVLPVQP 1

TKVLSVQP 1

TKVLVVQP 1

TKVMVVQP 1

TKVYVVQP 1

TLNFPQIT 1

TLVLVVQP 1

TSVLVVQP 1

TVVLVVQP 1

VKVLVVQP 1

AAIMMQKG 1

AAIMMQRG 1

ACAWLEAQ 1

ADTFYVDG 1

AETYYVDG 1

AFSFPQIT 1

AKVLAEAM 1

ALNFPQIT 1

ANIMMQKS 1

ANIMMQRG 1

ARILAEAM 1

ARVLGEAM 1

ATIMIQRG 1

ATIMLQRG 1

ATIMMQGG 1

ATIMMQKG 1

ATIMMQRS 1

ATMMMQRG 1

ATVMMQRG 1

DCARLEAQ 1

DCAWLEAH 1

DCAWLEAQ 1

DCAWLEEQ 1

DCAWLEPQ 1

DCAWLETQ 1

DCAWLKAQ 1

DCAWLQAQ 1

DCAWLRAQ 1

DCAWQEAQ 1

DCAWVEAQ 1

DCTWLEAQ 1

DCVWLEAQ 1

DGAWLEAQ 1

DIAWLEAQ 1

DLAFPQGK 1

DLAFQQGE 1

DLAWLEAQ 1

DSAWLEAQ 1

DVAWLEAQ 1

DYAWLEAQ 1

ECAWLEAQ 1

GFSFPQIT 1

GQANFLRE 1

HCAWLEAQ 1

MNIMMQKS 1

NCAWLEAQ 1

NLAFLQGE 1

NLAFLQGK 1

NLAFPEGE 1

NLAFPQGE 1

NLAFPQGK 1

NLAFPQRK 1

NLAFPRGK 1

NLAFQKGE 1

NLAFQQGE 1

NLAFQQGK 1

NLAFQQRE 1

NLASQQGE 1

NLNFPQIT 1

NLVFPQGK 1

NLVFQQGE 1

NMAFPQGK 1

NNIMMQKS 1

NTIMMQRG 1

PAIMMQKG 1

PGNFIQSR 1

PGNFLQGR 1

PGNFLQKR 1

PGNFLQNR 1

PGNFLQRR 1

RGNFLQSR 1

RQADFLGK 1

RQADFLRE 1

RQANFLGR 1

RQANFLRE 1

RRANFLRE 1

SAIMMQKG 1

SCAWLEAQ 1

SFCFPQIT 1

SFDFPQIT 1

SFIFPQIT 1

SFSCPQIT 1

SFSFPHIT 1

SFSFPQIT 1

SFSFPQVT 1

SFSFPRIT 1

SFSLPQIT 1

SLNFPQIT 1

SLSFPQIT 1

SNIMMQKS 1

SQNYPIAQ 1

SSSFPQIT 1

TAAMMQKG 1

TAILMQKG 1

TAIMIQKG 1

TAIMLQKG 1

TAIMMQKG 1

TAIMMQKS 1

TAIMMQRG 1

TAIMVQKG 1

TAMMMQKG 1

TAVMMQKG 1

TCAWLEAQ 1

TFSFPQIT 1

TGIMMQKS 1

TLAFQQGE 1

TLNCPQIT 1

TLNFLQIT 1

TLNFPQIA 1

TLNLPQIT 1

TLSFPQIT 1

TLVFPQIT 1

TNILMQKS 1

TNIMIQKS 1

TNIMMQKG 1

TNIMMQKN 1

TNIMMQKS 1

TNIMMQRS 1

TNIMVQKS 1

TNVMMQKS 1

TSIMMQKG 1

TSIMMQKS 1

TTIMMQKG 1

TTIMMQKS 1

TTIMMQRG 1

TVIMMQKG 1

VAIMMQKG 1

VETFYVDG 1

VLAFQQGE 1

VNIMMQKS 1

VTIMMQRG 1

AAVLAEAM 1

AFVLAEAM 1

AGVLAEAM 1

AQVLAEAM 1

ARALAEAM 1

ARGLAEAM 1

ARRLAEAM 1

ARVAAEAM 1

ARVFAEAM 1

ARVIAEAM 1

ARVLAEAA 1

ARVLAEAE 1

ARVLAEAG 1

ARVLAEAK 1

ARVLAEAP 1

ARVLAEAR 1

ARVLAEEM 1

ARVLAEFM 1

ARVLAEGM 1

ARVLAERM 1

ARVLAESM 1

ARVLALAM 1

ARVLAVAM 1

ARVLFEAM 1

ARVLIEAM 1

ARVLLEAM 1

ARVLMEAM 1

ARVLNEAM 1

ARVLVEAM 1

ARVMAEAM 1

ARVNAEAM 1

ARVYAEAM 1

ATVLAEAM 1

ATVLTVAL 1

DLVLLSAE 1

EEIMLAYQ 1

ELILPVKR 1

ERVLAEAM 1

FQAYPLRE 1

KDIFPVTE 1

KLVLAQLS 1

KMMLLAKA 1

LECLLSIP 1

MRVLAEAM 1

PAILPIIS 1

PASWLAMT 1

PAVSLHMT 1

PLIMAVVN 1

PMVGVLDA 1

PQVLPVMH 1

PRVLAEAM 1

PVILPIQA 1

QITLPKRP 1

RRVLAEAM 1

SEEYPIMI 1

SKAFLADT 1

SQAFPLRA 1

ARNLAEAM 0

ARSLAEAM 0

ARVLAAAM 0

ARVLADAM 0

ARVLAEDM 0

ARVLAGAM 0

ARVLANAM 0

ARVVAEAM 0

ASILPVIP 0

FHVNGLVK 0

FQVNGLVK 0

FSVNGLVK 0

FVVNGLVK 0

GGRINVAL 0

GSGGRINV 0

GSGVYQLS 0

GVFSVNGL 0

GVYQLSAL 0

INVALVPK 0

KGSGGRIN 0

KGSGLTMV 0

KGSGVYQL 0

KQTFPIQQ 0

KSGVFSVN 0

LQVLTLNI 0

PAILVHTP 0

PYVGSGLY 0

QLSALVPK 0

RINVALVP 0

SGGRINVA 0

SKLLATVV 0

STLLIENS 0

SSLYPALT 1

TFTFPVVF 1

TSCYCHGT 1

TSLLTLDD 0

VFSVNGLV 0

VVAMPVVI 0

VYQLSALV 0

YQLSALVP 0

ATIMMQRE 1

PLFAGISE 1

PLIMANVN 1

LFAGISDW 0

SQNYPQVQ 1

ARNYPIAQ 1

SRNYPEVQ 1

SRVLAEAM 1

SRVLAIAM 1

SQNYPEAQ 1

ARVLAIAM 1

SQNYPEVQ 1

ARNYPQAQ 1

SRNYPEAQ 1

ARNYPEAQ 1

SRNYPIAQ 1

TSCYHCGT 1

SKRTFLIK 0

SYRRMFGG 0

DTIGRLQD 0

LKKLHEEE 0

THSKRTFL 0

HEEEIQEL 0

KNLQEAEE 0

RFLEQQNK 0

REEAENTL 0

GVRLLQDS 0

RDNLAEDI 0

LGDLYEEE 0

EAANRNND 0

IDKVRFLE 0

ESTEYRRQ 0

SVSSSSYR 0

IGRLQDEI 0

SLQEEIAF 0

LSEAANRN 0

LNDRFANY 0

RETNLDSL 0

LLQDSVDF 0

RLGDLYEE 0

RPSSSRSY 0

LVDTHSKR 0

QLTNDKAR 0

DALKGTNE 0

KILLAELE 0

HLREYQDL 0

LKGTNESL 0

RISLPLPN 0

PGVRLLQD 0

DSLPLVDT 0

GEESRISL 0

VDFSLADA 0

GKSRLGDL 0

SRLGDLYE 0

PDLTAALR 0

IQELQAQI 0

IDVDVSKP 0

QELNDRFA 0

TNESLERQ 0

KNTRTNEK 0

GPGTASRP 0

GGPGTASR 0

RTNEKVEL 0

LQEAEEWY 0

EDIMRLRE 0

NYIDKVRF 0

AVEAANYQ 0

NDALRQAK 0

FSLADAIN 0

DLSEAANR 0

YSLGSALR 0

QSLTCEVD 0

TRSSAVRL 0

QMREMEEN 0

FRQDVDNA 0

RSSAVRLR 0

SFRQDVDN 0

NFAVEAAN 0

SQHHDDLE 0

EMLQREEA 0

KSRLGDLY 0

NTLQSFRQ 0

NETSQHHD 0

SLGSALRP 0

MARHLREY 0

EEEMRELR 0

FADLSEAA 0

RRQVQSLT 0

NKILLAEL 0

STEYRRQV 0

ERDNLAED 0

LEQLKGQG 0

SRSYVTTS 0

VETRDGQV 0

ALDIEIAT 0

HSKRTFLI 0

VRQQYESV 0

AELEQLKG 0

INETSQHH 0

LRSSVPGV 0

MFGGPGTA 0

AENTLQSF 0

ERKVESLQ 0

AEDIMRLR 0

VSKPDLTA 0

ASSPGGVY 0

ALKGTNES 0

RDGQVINE 0

EEMRELRR 0

ESLQEEIA 0

ELQELNDR 0

ATRSSAVR 0

ISLPLPNF 0

LQEEMLQR 0

QELQAQIQ 0

YESVAAKN 0

QEEMLQRE 0

RDVRQQYE 0

LRDVRQQY 0

NDRFANYI 0

LQAQIQEQ 0

EAENTLQS 0

LREYQDLL 0

KGQGKSRL 0

ANRNNDAL 0

LARLDLER 0

QDVDNASL 0

EEAENTLQ 0

RSVSSSSY 0

AKQESTEY 0

KKLHEEEI 0

REKLQEEM 0

ARHLREYQ 0

LQDSVDFS 0

LHEEEIQE 0

VELQELND 0

QDEIQNMK 0

QSFRQDVD 0

TEYRRQVQ 0

EAANYQDT 0

EENFAVEA 0

VQSLTCEV 0

IAFLKKLH 0

RLREKLQE 0

EQLKGQGK 0

KARVEVER 0

LERQMREM 0

TCEVDALK 0

QQNKILLA 0

QESTEYRR 0

REYQDLLN 0

QDLLNVKM 0

RPSTSRSL 0

ERQMREME 0

KLLEGEES 0

EKLQEEML 0

QIDVDVSK 0

KGTNESLE 0

WYKSKFAD 0

FLEQQNKI 0

EIQNMKEE 0

LPLPNFSS 0

QEAEEWYK 0

KLQEEMLQ 0

ARVEVERD 0

GSALRPST 0

DFSLADAI 0

QNKILLAE 0

SLPLPNFS 0

VDNASLAR 0

FKNTRTNE 0

VRLRSSVP 0

RQMREMEE 0

YQDTIGRL 0

SSSRSYVT 0

LRRQVDQL 0

AEEWYKSK 0

DKARVEVE 0

QVINETSQ 0

MEENFAVE 0

ETNLDSLP 0

EIAFLKKL 0

LQELNDRF 0

SLTCEVDA 0

TASRPSSS 0

TRTYSLGS 0

ARLDLERK 0

SLERQMRE 0

PSSSRSYV 0

EVDALKGT 0

GDLYEEEM 0

ELNDRFAN 0

QGKSRLGD 0

KLHEEEIQ 0

LTNDKARV 0

VDVSKPDL 0

AAKNLQEA 0

KEEMARHL 0

RRMFGGPG 0

DGQVINET 0

LPNFSSLN 0

LTCEVDAL 0

YEEEMREL 0

GRLQDEIQ 0

EESRISLP 0

YVTTSTRT 0

EMARHLRE 0

DLTAALRD 0

NMKEEMAR 0

QREEAENT 0

QDTIGRLQ 0

GQVINETS 0

MKEEMARH 0

TRDGQVIN 0

RNNDALRQ 0

RLDLERKV 0

KPDLTAAL 0

LLEGEESR 0

ESLERQMR 0

HVQIDVDV 0

STRTYSLG 0

EWYKSKFA 0

KVELQELN 0

EEIAFLKK 0

SLPLVDTH 0

TIGRLQDE 0

AFLKKLHE 0

DRFANYID 0

SVAAKNLQ 0

LDIEIATY 0

AKNLQEAE 0

VEAANYQD 0

LQSFRQDV 0

EYRRQVQS 0

NEKVELQE 0

QHVQIDVD 0

EVERDNLA 0

NTRTNEKV 0

RFANYIDK 0

TTSTRTYS 0

VKMALDIE 0

TYRKLLEG 0

DSVDFSLA 0

EMEENFAV 0

ETSQHHDD 0

QDSVDFSL 0

LIKTVETR 0

STRSVSSS 0

SKFADLSE 0

EIATYRKL 0

NVKMALDI 0

ESRISLPL 0

VERDNLAE 0

FGGPGTAS 0

SEAANRNN 0

IQEQHVQI 0

MALDIEIA 0

YRKLLEGE 0

ASRPSSSR 0

EFKNTRTN 0

TNDKARVE 0

LYEEEMRE 0

PLPNFSSL 0

EKVELQEL 0

NRNNDALR 0

RHLREYQD 0

LLAELEQL 0

ILLAELEQ 0

SAVRLRSS 0

QEQHVQID 0

SVDFSLAD 0

IEIATYRK 0

EIQELQAQ 0

SLARLDLE 0

IKTVETRD 0

SSRSYVTT 0

FANYIDKV 0

GTASRPSS 0

LDSLPLVD 0

LREKLQEE 0

SRISLPLP 0

DLLNVKMA 0

DNLAEDIM 0

VESLQEEI 0

SALRPSTS 0

LNVKMALD 0

EEMLQREE 0

DALRQAKQ 0

QNMKEEMA 0

LRQAKQES 0

TEFKNTRT 0

DVDVSKPD 0

PLVDTHSK 0

EYQDLLNV 0

YKSKFADL 0

DVSKPDLT 0

CEVDALKG 0

VINETSQH 0

ANYQDTIG 0

QYESVAAK 0

RQDVDNAS 0

SYVTTSTR 0

RQQYESVA 0

DLYEEEMR 0

DNASLARL 0

PGTASRPS 0

YQDLLNVK 0

LKGQGKSR 0

FAVEAANY 0

VQIDVDVS 0

YASSPGGV 0

RSSVPGVR 0

RKLLEGEE 0

RMFGGPGT 0

REMEENFA 0

PNFSSLNL 0

TAALRDVR 0

KFADLSEA 0

RQVQSLTC 0

VRLLQDSV 0

GTNESLER 0

QEEIAFLK 0

YRRQVQSL 0

ASLARLDL 0

ALRDVRQQ 0

YRRMFGGP 0

RKVESLQE 0

TFLIKTVE 0

TRSVSSSS 0

EEMARHLR 0

VDALKGTN 0

DVRQQYES 0

LDLERKVE 0

IATYRKLL 0

LERKVESL 0

ANYIDKVR 0

QQYESVAA 0

LGSALRPS 0

GQGKSRLG 0

KSKFADLS 0

VRFLEQQN 0

IQNMKEEM 0

EQQNKILL 0

VTTSTRTY 0

AQIQEQHV 0

SSAVRLRS 0

MLQREEAE 0

VPGVRLLQ 0

TSQHHDDL 0

TNLDSLPL 0

RRQVDQLT 0

LEQQNKIL 0

RSYVTTST 0

NLAEDIMR 0

ELEQLKGQ 0

TNEKVELQ 0

DQLTNDKA 0

ALRPSTSR 0

NDKARVEV 0

DIMRLREK 0

SSYRRMFG 0

EAEEWYKS 0

DTHSKRTF 0

NYQDTIGR 0

LQDEIQNM 0

NASLARLD 0

LAELEQLK 0

KMALDIEI 0

QIQEQHVQ 0

TLQSFRQD 0

EEWYKSKF 0

EEIQELQA 0

QAKQESTE 0

DVDNASLA 0

TYSLGSAL 0

SSVPGVRL 0

ELRRQVDQ 0

LEGEESRI 0

VSSSSYRR 0

NLQEAEEW 0

QVQSLTCE 0

KVESLQEE 0

FLIKTVET 0

ESVAAKNL 0

QLKGQGKS 0

LLNVKMAL 0

LQEEIAFL 0

EQHVQIDV 0

RLRSSVPG 0

ETRDGQVI 0

SRPSSSRS 0

RLQDEIQN 0

EGEESRIS 0

NESLERQM 0

LQREEAEN 0

SVPGVRLL 0

ENTLQSFR 0

RVEVERDN 0

FLKKLHEE 0

ELQAQIQE 0

EEEIQELQ 0

AVRLRSSV 0

MRELRRQV 0

KTVETRDG 0

TVETRDGQ 0

LPLVDTHS 0

VEVERDNL 0

NNDALRQA 0

MSTRSVSS 0

LAEDIMRL 0

VAAKNLQE 0

QAQIQEQH 0

AALRDVRQ 0

RTYSLGSA 0

AANYQDTI 0

MRLREKLQ 0

DKVRFLEQ 0

YIDKVRFL 0

ATYRKLLE 0

SSSYRRMF 0

LTAALRDV 0

ALRQAKQE 0

LRPSTSRS 0

KRTFLIKT 0

AANRNNDA 0

RQVDQLTN 0

RLLQDSVD 0

KVRFLEQQ 0

DIEIATYR 0

MREMEENF 0

EMRELRRQ 0

SKPDLTAA 0

ADLSEAAN 0

TRTNEKVE 0

IMRLREKL 0

RELRRQVD 0

KQESTEYR 0

DLERKVES 0

QVDQLTND 0

SSSSYRRM 0

DEIQNMKE 0

VDQLTNDK 0

RTFLIKTV 0

TSTRTYSL 0

RQAKQEST 0

VDTHSKRT 0

NLDSLPLV 0

ENFAVEAA 0

TESIVIWG 0

LRGTKALT 0

HGYQLEKE 0

WPLTEEKI 0

AIKKKDST 0

ISPIETVP 0

SDLEIGQH 0

PYNTPVFA 0

AIFQSSMT 0

SVPLDEDF 0

EKEGKISK 0

KDSWTVND 0

NETPGIRY 0

WKGSPAIF 0

GTKALTEV 0

WWTEYWQA 0

LALQDSGL 0

YARMRGAH 0

YMDDLYVG 0

IAEIQKQG 0

DDLYVGSD 0

GIKVRQLC 0

WETWWTEY 0

DSQYALGI 0

PLDEDFRK 0

LNKRTQDF 0

TKALTEVI 0

KIKALVEI 0

RYQYNVLP 0

KKKDSTKW 0

GIPHPAGL 0

HDHPFHGY 0

TDSQYALG 0

SELVNQII 0

AGYVTNKG 0

VLPQGWKG 0

KPGMDGPK 0

EPFKNLKT 0

QGQWTYQI 0

KLKPGMDG 0

KWRKLVDF 0

YVTNKGRQ 0

QDSGLEVN 0

YQEPFKNL 0

RTKIEELR 0

IVLPEKDS 0

SQYALGII 0

YTAFTIPS 0

TVQPIVLP 0

GAHTNDVK 0

ETPGIRYQ 0

GIIQAQPD 0

AEIQKQGQ 0

TWWTEYWQ 0

IQKETWET 0

SQIYPGIK 0

QIIEQLIK 0

QNPDIVIY 0

QYMDDLYV 0

TTPDKKHQ 0

TVLDVGDA 0

DVKQLTEA 0

GQWTYQIY 0

IEELRQHL 0

ETVPVKLK 0

RQKVVPLT 0

KWTVQPIV 0

PEWEFVNT 0

KTELQAIY 0

HPGHLVIH 0

EYWQATWI 0

KQWPLTEE 0

VYYDPSKD 0

IPSINNET 0

LNWASQIY 0

LVDFRELN 0

TWIPEWEF 0

IKKKDSTK 0

PVFAIKKK 0

VQLGIPHP 0

KLGKAGYV 0

GGNEQVDK 0

KLLRGTKA 0

DFRKYTAF 0

PISPIETV 0

KQGQGQWT 0

KKQNPDIV 0

VNQIIEQL 0

AENREILK 0

GMDGPKVK 0

DHDHPFHG 0

NREILKEP 0

VSAGIRKI 0

TNKGRQKV 0

ASQIYPGI 0

DKSESELV 0

VFAIKKKD 0

LIKKEKVY 0

GKTPKFKL 0

GKISKIGP 0

QKQGQGQW 0

VDKLVSAG 0

IGPENPYN 0

VNTPPLVK 0

GSDLEIGQ 0

VIHPISPI 0

SPIETVPV 0

LPEKDSWT 0

KDSTKWRK 0

FKNLKTGK 0

EIQKQGQG 0

LKTGKYAR 0

VQPIVLPE 0

TNTTNQKT 0

ELNKRTQD 0

DSWTVNDI 0

VIWGKTPK 0

LTEEAELE 0

TYQIYQEP 0

QLTEAVQK 0

DGPKVKQW 0

STKWRKLV 0

GKLNWASQ 0

TGKYARMR 0

ALGIIQAQ 0

ALTEVIPL 0

EAVQKITT 0

LLRGTKAL 0

AVQKITTE 0

NDIQKLVG 0

WGLTTPDK 0

EMEKEGKI 0

INNETPGI 0

NTPPLVKL 0

PKVKQWPL 0

ILKEPVHG 0

NTTNQKTE 0

IPHPAGLK 0

PFKKQNPD 0

VGSDLEIG 0

FQSSMTKI 0

GVYYDPSK 0

HPAGLKKK 0

VGKLNWAS 0

GIRYQYNV 0

AFTIPSIN 0

QLCKLLRG 0

DEDFRKYT 0

PEKDSWTV 0

PDKSESEL 0

PGHLVIHP 0

TKWRKLVD 0

GKAGYVTN 0

LYVGSDLE 0

IYQEPFKN 0

FAIKKKDS 0

RELNKRTQ 0

ESIVIWGK 0

YQYNVLPQ 0

ANRETKLG 0

PIETVPVK 0

SWTVNDIQ 0

LLRWGLTT 0

EILKEPVH 0

LRQHLLRW 0

EKIKALVE 0

VHGVYYDP 0

IQKQGQGQ 0

PAHKGIGG 0

EKDSWTVN 0

VPLDEDFR 0

TPDKKHQK 0

PENPYNTP 0

RGTKALTE 0

EPVHGVYY 0

LVIHPISP 0

LKKKKSVT 0

QYNVLPQG 0

KEPPFLWM 0

TEYWQATW 0

KQLTEAVQ 0

RKYTAFTI 0

FVNTPPLV 0

QHLLRWGL 0

NEQVDKLV 0

KTPKFKLP 0

EPPFLWMG 0

HTNDVKQL 0

YQYMDDLY 0

HQKEPPFL 0

QKLVGKLN 0

LKEPVHGV 0

PIQKETWE 0

KHQKEPPF 0

DKWTVQPI 0

PKFKLPIQ 0

WQATWIPE 0

KKHQKEPP 0

PGIKVRQL 0

KYTAFTIP 0

SESELVNQ 0

KKKSVTVL 0

VTVLDVGD 0

IVIYQYMD 0

VKQLTEAV 0

KTGKYARM 0

QATWIPEW 0

TTNQKTEL 0

TEMEKEGK 0

KILEPFKK 0

LEPFKKQN 0

KNLKTGKY 0

QKTELQAI 0

EQVDKLVS 0

EQLIKKEK 0

LEKEPIVG 0

LPQGWKGS 0

GPENPYNT 0

WGKTPKFK 0

TKILEPFK 0

PDKKHQKE 0

PPLVKLWY 0

IYPGIKVR 0

RMRGAHTN 0

IKVRQLCK 0

TEAVQKIT 0

KVVPLTNT 0

NDVKQLTE 0

QWPLTEEK 0

VNDIQKLV 0

AWVPAHKG 0

EFVNTPPL 0

IHDHDHPF 0

TWETWWTE 0

KGRQKVVP 0

ETWWTEYW 0

QEPFKNLK 0

NWASQIYP 0

YVGSDLEI 0

KALTEVIP 0

ENPYNTPV 0

KGSPAIFQ 0

KKSVTVLD 0

PFHGYQLE 0

YELHPDKW 0

FKKQNPDI 0

QLGIPHPA 0

VTDSQYAL 0

HLVIHPIS 0

NPYNTPVF 0

ILEPFKKQ 0

IEQLIKKE 0

PAGLKKKK 0

LGIIQAQP 0

EPFKKQNP 0

MRGAHTND 0

GKYARMRG 0

HPISPIET 0

LKPGMDGP 0

PLTNTTNQ 0

QHRTKIEE 0

SMTKILEP 0

DFRELNKR 0

QWTYQIYQ 0

TIPSINNE 0

TEEKIKAL 0

EDFRKYTA 0

HGVYYDPS 0

GLTTPDKK 0

QYALGIIQ 0

WTVNDIQK 0

YQLEKEPI 0

RETKLGKA 0

NNETPGIR 0

MEKEGKIS 0

ATWIPEWE 0

GNEQVDKL 0

LRWGLTTP 0

KLVGKLNW 0

PIHHHHHH 0

QVDKLVSA 0

ITTESIVI 0

TNDVKQLT 0

EELRQHLL 0

HHPGHLVI 0

LPIQKETW 0

PFKNLKTG 0

GSPAIFQS 0

DIVIYQYM 0

IWGKTPKF 0

LVGKLNWA 0

ISKIGPEN 0

ETWETWWT 0

TKIEELRQ 0

QGWKGSPA 0

FRELNKRT 0

NTPVFAIK 0

VIYQYMDD 0

ALQDSGLE 0

TPPLVKLW 0

IIEQLIKK 0

WTVQPIVL 0

KEPVHGVY 0

KQNPDIVI 0

FRKYTAFT 0

NVLPQGWK 0

SIVIWGKT 0

KLVDFREL 0

HHHHHHPG 0

ARMRGAHT 0

VDFRELNK 0

TAFTIPSI 0

YALGIIQA 0

QPIVLPEK 0

EWEFVNTP 0

VDGAANRE 0

FTIPSINN 0

ELRQHLLR 0

HLLRWGLT 0

AGLKKKKS 0

IETVPVKL 0

QPDKSESE 0

LEIGQHRT 0

WEFVNTPP 0

SVTVLDVG 0

GWKGSPAI 0

SINNETPG 0

DKLVSAGI 0

GPKVKQWP 0

TEEAELEL 0

GQHRTKIE 0

SPAIFQSS 0

NPDIVIYQ 0

YQIYQEPF 0

KITTESIV 0

GHLVIHPI 0

LGIPHPAG 0

YVDGAANR 0

PGMDGPKV 0

QSSMTKIL 0

LCKLLRGT 0

DSTKWRKL 0

DHPFHGYQ 0

GQGQWTYQ 0

KGIGGNEQ 0

QKVVPLTN 0

RKLVDFRE 0

GRQKVVPL 0

HHHPGHLV 0

IIQAQPDK 0

EVIPLTEE 0

SKIGPENP 0

GYVTNKGR 0

KLWYQLEK 0

GIGGNEQV 0

QAQPDKSE 0

IPLTEEAE 0

PDKWTVQP 0

SAGIRKIL 0

YYDPSKDL 0

KSVTVLDV 0

TPVFAIKK 0

KISKIGPE 0

VLDVGDAY 0

PLTEEAEL 0

QLEKEPIV 0

VQKITTES 0

SSMTKILE 0

HHHHHPGH 0

TTESIVIW 0

PQGWKGSP 0

EVQLGIPH 0

WASQIYPG 0

KVKQWPLT 0

PIHDHDHP 0

TEVIPLTE 0

LVKLWYQL 0

IQKLVGKL 0

KIGPENPY 0

IYQYMDDL 0

HKGIGGNE 0

WRKLVDFR 0

MDDLYVGS 0

GAANRETK 0

NLKTGKYA 0

EIGQHRTK 0

VKQWPLTE 0

LVSAGIRK 0

QKETWETW 0

GLKKKKSV 0

PLVKLWYQ 0

KKKKSVTV 0

EEKIKALV 0

VIPLTEEA 0

KKDSTKWR 0

IPEWEFVN 0

WEVQLGIP 0

KLNWASQI 0

TPKFKLPI 0

YPGIKVRQ 0

HRTKIEEL 0

NKGRQKVV 0

MDGPKVKQ 0

WVPAHKGI 0

HPFHGYQL 0

IHHHHHHP 0

MTKILEPF 0

ELVNQIIE 0

GYQLEKEP 0

KYARMRGA 0

YNTPVFAI 0

VVPLTNTT 0

DIQKLVGK 0

LQDSGLEV 0

KVRQLCKL 0

PLTEEKIK 0

IKALVEIC 0

KEGKISKI 0

PHPAGLKK 0

LTEVIPLT 0

QLIKKEKV 0

ENREILKE 0

VKLWYQLE 0

IGQHRTKI 0

DLEIGQHR 0

IVIWGKTP 0

KIEELRQH 0

LAWVPAHK 0

LGKAGYVT 0

AQPDKSES 0

PVKLKPGM 0

LHPDKWTV 0

LDEDFRKY 0

YNVLPQGW 0

CKLLRGTK 0

VRQLCKLL 0

VTNKGRQK 0

IHPISPIE 0

RGAHTNDV 0

IVTDSQYA 0

VPLTNTTN 0

IRYQYNVL 0

EGKISKIG 0

AHTNDVKQ 0

HHHHPGHL 0

LWYQLEKE 0

DLYVGSDL 0

ELHPDKWT 0

QIYQEPFK 0

AANRETKL 0

YWQATWIP 0

DGAANRET 0

PGIRYQYN 0

KSESELVN 0

KETWETWW 0

ESELVNQI 0

KLPIQKET 0

REILKEPV 0

VKLKPGMD 0

LTTPDKKH 0

QKITTESI 0

WTYQIYQE 0

IGGNEQVD 0

RWGLTTPD 0

LTEEKIKA 0

TPGIRYQY 0

QGQGQWTY 0

VLPEKDSW 0

KLVSAGIR 0

IQAQPDKS 0

HPDKWTVQ 0

PIVLPEKD 0

VPVKLKPG 0

PVHGVYYD 0

RQLCKLLR 0

QKEPPFLW 0

LTNTTNQK 0

QIYPGIKV 0

LTEAVQKI 0

VPAHKGIG 0

RQHLLRWG 0

NRETKLGK 0

KFKLPIQK 0

AHKGIGGN 0

TNQKTELQ 0

FHGYQLEK 0

NQIIEQLI 0

LVNQIIEQ 0

DKKHQKEP 0

PSINNETP 0

PDIVIYQY 0

WYQLEKEP 0

TVNDIQKL 0

FSVPLDED 0

IFQSSMTK 0

WTEYWQAT 0

TKLGKAGY 0

ETKLGKAG 0

TVPVKLKP 0

PAIFQSSM 0

FKLPIQKE 0

NQKTELQA 0

KAGYVTNK 0

WIPEWEFV 0

HDHDHPFH 0
