# Supplementary material for: Feature Selection Combined with Neural Network Structure Optimization for HIV-1 Protease Cleavage Site Prediction
Source: Biomed Res Int. 2015 Apr 15;2015:263586. doi: 10.1155/2015/263586 (PMC4413510; doi:10.1155/2015/263586)
Supplement: Supplementary file 1 — The document covers the design of the feature selection method combined with neural network structure optimization. Meanwhile, this document contains the feature extraction of traditional orthogonal encoding features, PCA and NLF based features. Combination fusion and decision fusion method based on these features aim to get comprehensive feature representation and improve prediction performance are listed in the document. [file 263586.f1.zip › Optional Supplementary Materials/classification code/plotTickLatex2D.m]

% 
% Copyright (C) 2011 Alex Bikfalvi
%
% This program is free software; you can redistribute it and/or modify
% it under the terms of the GNU General Public License as published by
% the Free Software Foundation; either version 3 of the License, or (at
% your option) any later version.

% This program is distributed in the hope that it will be useful, but
% WITHOUT ANY WARRANTY; without even the implied warranty of
% MERCHANTABILITY or FITNESS FOR A PARTICULAR PURPOSE.  See the GNU
% General Public License for more details.

% You should have received a copy of the GNU General Public License
% along with this program; if not, write to the Free Software
% Foundation, Inc., 51 Franklin Street, Fifth Floor, Boston, MA 02110-1301, USA.
%

function plotTickLatex2D(varargin)

% Optional arguments
optargin = size(varargin,2);

if mod(optargin,2) ~= 0
    error('The number of optional arguments must be even');
end

xLabelDy = 0;
yLabelDx = 0;
hAxis = gca;

i = 1;
while i <= optargin
    switch lower(varargin{i})
        case 'xlabeldy'
            xLabelDy = varargin{i+1};
        case 'ylabeldx'
            yLabelDx = varargin{i+1};
        case 'axis'
            hAxis = varargin{i+1};
        case 'fontsize'
            fontSize = varargin{i+1};
    end
    i = i + 2;
end

% Get properties for the specified axis
xLimit = get(hAxis,'XLim');
xTick = get(hAxis,'XTick');
xTickLabel = get(hAxis,'XTickLabel');
xTickLabelMode = get(hAxis,'XTickLabelMode');
xScale = get(hAxis,'XScale');
xAxisLocation = get(hAxis,'XAxisLocation');

yLimit = get(hAxis,'YLim');
yTick = get(hAxis,'YTick');
yTickLabel = get(hAxis,'YTickLabel');
yTickLabelMode = get(hAxis,'YTickLabelMode');
yScale = get(hAxis,'YScale');
yAxisLocation = get(hAxis,'YAxisLocation');

if ~exist('fontSize','var')
    fontSize = get(hAxis, 'FontSize');
end

% Get properties for the current axis
xLimitCurr = get(gca,'XLim');
xScaleCurr = get(gca,'XScale');

yLimitCurr = get(gca,'YLim');
yScaleCurr = get(gca,'YScale');

% Clear the current labels
set(hAxis,'XTickLabel',[]);
set(hAxis,'YTickLabel',[]);

% Get position of the specified axis
posAxis = get(hAxis,'Position');

% Get position of the current axis
posCurr = get(gca, 'Position');

% Convert x point between figure and axis data coordinates on linear scale
xFig2DatLinAxis = @(x)(xLimit(1) + diff(xLimit)*(x-posAxis(1))/posAxis(3));
xDat2FigLinAxis = @(x)(posAxis(1) + (x - xLimit(1))*posAxis(3)/diff(xLimit));

xFig2DatLinCurr = @(x)(xLimitCurr(1) + diff(xLimitCurr)*(x-posCurr(1))/posCurr(3));
xDat2FigLinCurr = @(x)(posCurr(1) + (x - xLimitCurr(1))*posCurr(3)/diff(xLimitCurr));

% Convert y point between figure and axis data coordinates on linear scale
yFig2DatLinAxis = @(y)(yLimit(1) + diff(yLimit)*(y-posAxis(2))/posAxis(4));
yDat2FigLinAxis = @(y)(posAxis(2) + (y - yLimit(1))*posAxis(4)/diff(yLimit));

yFig2DatLinCurr = @(y)(yLimitCurr(1) + diff(yLimitCurr)*(y-posCurr(2))/posCurr(4));
yDat2FigLinCurr = @(y)(posCurr(2) + (y - yLimitCurr(1))*posCurr(4)/diff(yLimitCurr));

% Convert x point between figure and axis data coordinates on logarithmic scale
xFig2DatLogAxis = @(x)(exp(log(xLimit(1)) + log(xLimit(2)/xLimit(1))*(x-posAxis(1))/posAxis(3)));
xDat2FigLogAxis = @(x)(posAxis(1) + posAxis(3)*log(x/xLimit(1))/log(xLimit(2)/xLimit(1)));

xFig2DatLogCurr = @(x)(exp(log(xLimitCurr(1)) + log(xLimitCurr(2)/xLimitCurr(1))*(x-posCurr(1))/posCurr(3)));
xDat2FigLogCurr = @(x)(posCurr(1) + posCurr(3)*log(x/xLimitCurr(1))/log(xLimitCurr(2)/xLimitCurr(1)));

% Convert y point between figure and axis data coordinates on logarithmic scale
yFig2DatLogAxis = @(y)(exp(log(yLimit(1)) + log(yLimit(2)/yLimit(1))*(y-posAxis(2))/posAxis(4)));
yDat2FigLogAxis = @(y)(posAxis(2) + posAxis(4)*log(y/yLimit(1))/log(yLimit(2)/yLimit(1)));

yFig2DatLogCurr = @(y)(exp(log(yLimitCurr(1)) + log(yLimitCurr(2)/yLimitCurr(1))*(y-posCurr(2))/posCurr(4)));
yDat2FigLogCurr = @(y)(posCurr(2) + posCurr(4)*log(y/yLimitCurr(1))/log(yLimitCurr(2)/yLimitCurr(1)));

% Convert x point between figure and axis [0,1] coordinates
xFig2Ax = @(x)((x - posAxis(1))/posAxis(3));
xAx2Fig = @(x)(posAxis(1) + x*posAxis(3));

% Convert y point between figure and axis [0,1] coordinates
yFig2Ax = @(y)((y - posAxis(2))/posAxis(4));
yAx2Fig = @(y)(posAxis(2) + x*posAxis(4));

switch xScale
    case 'linear'
        xFig2DatAxis = xFig2DatLinAxis;
        xDat2FigAxis = xDat2FigLinAxis;
    case 'log'
        xFig2DatAxis = xFig2DatLogAxis;
        xDat2FigAxis = xDat2FigLogAxis;
end

switch yScale
    case 'linear'
        yFig2DatAxis = yFig2DatLinAxis;
        yDat2FigAxis = yDat2FigLinAxis;
    case 'log'
        yFig2DatAxis = yFig2DatLogAxis;
        yDat2FigAxis = yDat2FigLogAxis;
end

switch xScaleCurr
    case 'linear'
        xFig2DatCurr = xFig2DatLinCurr;
        xDat2FigCurr = xDat2FigLinCurr;
    case 'log'
        xFig2DatCurr = xFig2DatLogCurr;
        xDat2FigCurr = xDat2FigLogCurr;
end

switch yScaleCurr
    case 'linear'
        yFig2DatCurr = yFig2DatLinCurr;
        yDat2FigCurr = yDat2FigLinCurr;
    case 'log'
        yFig2DatCurr = yFig2DatLogCurr;
        yDat2FigCurr = yDat2FigLogCurr;
end

if ~isempty(xTickLabel)
    % Set the X Axis
    
    xTickIndex = find((xTick >= xLimit(1)) & (xTick <= xLimit(2)));
    xTickVisible = xTick((xTick >= xLimit(1)) & (xTick <= xLimit(2)));
    xLabel = cell(length(xTickVisible),1);
    
    switch xTickLabelMode
        case 'auto'
            assert(length(xTickVisible) <= size(xTickLabel,1));
            switch xScale 
                case 'linear'
                    % Determine where there should be an exponent
                    xExp = max(abs(xLimit));
                    if xExp > 0
                        xExpLog = ceil(log10(xExp));
                        if(xExpLog > 0)
                            xExpLog = xExpLog - 1;
                        end
                        if (xExpLog > -3) && (xExpLog <= 3)
                            xExpLog = 0;
                        end
                    else
                        xExpLog = 0;
                    end
                    xExp = 10^xExpLog;
                    
                    for i=1:length(xTickVisible)
                        value = xTickVisible(i)/xExp;
                        if abs(value) <= eps
                            value = 0;
                        end
                        xLabel{i} = ['$' num2str(value) '$'];
                    end
                    
                    if (abs(xExpLog) > eps) && (abs(xExpLog) < 1/eps)
                        switch xAxisLocation
                            case 'bottom'
                                hText = text(...
                                    xFig2DatCurr(xDat2FigAxis(xLimit(2))),...
                                    yFig2DatCurr(yDat2FigAxis(yLimit(1))-0.06),...
                                    ['$\times 10^{' num2str(xExpLog) '}$'],...
                                    'HorizontalAlignment','Right',...
                                    'Interpreter','latex',...
                                    'FontSize', fontSize);
                            case 'top'
                                hText = text(...
                                    xFig2DatCurr(xDat2FigAxis(xLimit(2))),...
                                    yFig2DatCurr(yDat2FigAxis(yLimit(2))+0.06),...
                                    ['$\times 10^{' num2str(xExpLog) '}$'],...
                                    'HorizontalAlignment','Right',...
                                    'Interpreter','latex',...
                                    'FontSize', fontSize);
                        end
                        set(hText,'HitTest','off');
                    end                    
                case 'log'
                    for i=1:length(xTickVisible)
                        sgn = sign(xTickVisible(i));
                        xExp = log10(abs(xTickVisible(i)));
                        if abs(xExp) <= eps
                            xExp = 0;
                        end
                        xLabel{i} = ['$' num2str(10*sgn) '^{' num2str(xExp) '}$'];
                    end
            end
        case 'manual'
            if iscell(xTickLabel)
                for i=1:length(xTickVisible)
                    xLabel{i} = xTickLabel{1+mod(xTickIndex(i)-1,length(xTickLabel))};
                end
            else
                for i=1:length(xTickVisible)
                    xLabel{i} = xTickLabel(1+mod(xTickIndex(i)-1,size(xTickLabel,1)),:);
                end
            end
    end

    switch xAxisLocation
        case 'bottom'
            for i = 1:length(xTickVisible)
                hText = text(...
                    xFig2DatCurr(xDat2FigAxis(xTickVisible(i))),...
                    yFig2DatCurr(yDat2FigAxis(yLimit(1))-0.025),...
                    strtrim(xLabel{i}),...
                    'HorizontalAlignment','Center',...
                    'Interpreter','latex',...
                    'FontSize', fontSize);
                set(hText,'HitTest','off');
            end
        case 'top'
            for i = 1:length(xTickVisible)
                hText = text(...
                    xFig2DatCurr(xDat2FigAxis(xTickVisible(i))),...
                    yFig2DatCurr(yDat2FigAxis(yLimit(2))+0.025),...
                    strtrim(xLabel{i}),...
                    'HorizontalAlignment','Center',...
                    'Interpreter','latex',...
                    'FontSize', fontSize);
                set(hText,'HitTest','off');
            end
    end

    xLabel = get(hAxis,'XLabel');
    xLabelPos = get(xLabel,'Position');
    set(xLabel,'Position',[xLabelPos(1) yFig2DatCurr(yDat2FigAxis(yLimit(1))-0.07+xLabelDy) xLabelPos(3)]);

    xlim(hAxis, xLimit);
end

if ~isempty(yTickLabel)
    % Set the Y axis
    
    yTickIndex = find((yTick >= yLimit(1)) & (yTick <= yLimit(2)));
    yTickVisible = yTick((yTick >= yLimit(1)) & (yTick <= yLimit(2)));
    yLabel = cell(length(yTickVisible),1);
    
    switch yTickLabelMode
        case 'auto'
            assert(length(yTickVisible) <= size(yTickLabel,1));
            switch yScale
                case 'linear'
                    % Determine where there should be an exponent
                    yExp = max(abs(yLimit));
                    if yExp > 0
                        yExpLog = ceil(log10(yExp))-1;
                        if(yExpLog > 0)
                            yExpLog = yExpLog - 1;
                        end
                        if (yExpLog > -3) && (yExpLog <= 3)
                            yExpLog = 0;
                        end
                    else
                        yExpLog = 0;
                    end
                    yExp = 10^yExpLog;
                    
                    for i=1:length(yTickVisible)
                        value = yTickVisible(i)/yExp;
                        if abs(value) <= eps
                            value = 0;
                        end
                        yLabel{i} = ['$' num2str(value) '$'];
                    end
                    
                    if (abs(yExpLog) > eps) && (abs(yExpLog) < 1/eps)
                        switch yAxisLocation
                            case 'left'
                                hText = text(...
                                    xFig2DatCurr(xDat2FigAxis(xLimit(1))),...
                                    yFig2DatCurr(yDat2FigAxis(yLimit(2)) + 0.03),...
                                    ['$\times 10^{' num2str(yExpLog) '}$'],...
                                    'Interpreter','latex',...
                                    'FontSize', fontSize);
                            case 'right'
                                hText = text(...
                                    xFig2DatCurr(xDat2FigAxis(xLimit(2))),...
                                    yFig2DatCurr(yDat2FigAxis(yLimit(2)) + 0.03),...
                                    ['$\times 10^{' num2str(yExpLog) '}$'],...
                                    'HorizontalAlignment','Right',...
                                    'Interpreter','latex',...
                                    'FontSize', fontSize);
                        end
                        set(hText,'HitTest','off');
                    end                    
                case 'log'
                    for i=1:length(yTickVisible)
                        sgn = sign(yTickVisible(i));
                        yExp = log10(yTickVisible(i));
                        if abs(yExp) <= eps
                            yExp = 0;
                        end
                        yLabel{i} = ['$' num2str(10*sgn) '^{' num2str(yExp) '}$'];
                    end
            end
        case 'manual'
            if iscell(yTickLabel)
                for i=1:length(yTickVisible)
                    yLabel{i} = yTickLabel{1+mod(yTickIndex(i)-1,length(yTickLabel))};
                end
            else
                for i=1:length(yTickVisible)
                    yLabel{i} = yTickLabel(1+mod(yTickIndex(i)-1,size(yTickLabel,1)),:);
                end
            end
    end

    xMin = bitmax;
    
    switch yAxisLocation
        case 'left'
            for i = 1:length(yTickVisible)
                hText = text(...
                    xFig2DatCurr(xDat2FigAxis(xLimit(1))-0.01),...
                    yFig2DatCurr(yDat2FigAxis(yTickVisible(i))),...
                    strtrim(yLabel{i}),...
                    'HorizontalAlignment','Right',...
                    'Interpreter','latex',...
                    'FontSize', fontSize);
                set(hText,'HitTest','off');
                set(hText,'Units','normalized');
                xExt = get(hText,'Extent');
                set(hText,'Units','data');
                xMin = min(xMin, xExt(1));
            end
        case 'right'
            for i = 1:length(yTickVisible)
                hText = text(...
                    xFig2DatCurr(xDat2FigAxis(xLimit(2))+0.01),...
                    yFig2DatCurr(yDat2FigAxis(yTickVisible(i))),...
                    strtrim(yLabel{i}),...
                    'HorizontalAlignment','Left',...
                    'Interpreter','latex',...
                    'FontSize', fontSize);
                set(hText,'HitTest','off');
                set(hText,'Units','normalized');
                xExt = get(hText,'Extent');
                set(hText,'Units','data');
                xMin = min(xMin, xExt(1));
            end
    end

    yLabel = get(hAxis,'YLabel');
    yLabelPos = get(yLabel,'Position');
    set(yLabel,'Position',[xFig2DatCurr(xAx2Fig(xMin) - 0.002 + yLabelDx) yLabelPos(2) yLabelPos(3)]);

    ylim(hAxis, yLimit);
end
    

end
