# Supplementary material for: Feature Selection Combined with Neural Network Structure Optimization for HIV-1 Protease Cleavage Site Prediction
Source: Biomed Res Int. 2015 Apr 15;2015:263586. doi: 10.1155/2015/263586 (PMC4413510; doi:10.1155/2015/263586)
Supplement: Supplementary file 1 — The document covers the design of the feature selection method combined with neural network structure optimization. Meanwhile, this document contains the feature extraction of traditional orthogonal encoding features, PCA and NLF based features. Combination fusion and decision fusion method based on these features aim to get comprehensive feature representation and improve prediction performance are listed in the document. [file 263586.f1.zip › Optional Supplementary Materials/classification code/plotTickLatex2DExample.m]

% 
% Copyright (C) 2011 Alex Bikfalvi
%
% This program is free software; you can redistribute it and/or modify
% it under the terms of the GNU General Public License as published by
% the Free Software Foundation; either version 3 of the License, or (at
% your option) any later version.

% This program is distributed in the hope that it will be useful, but
% WITHOUT ANY WARRANTY; without even the implied warranty of
% MERCHANTABILITY or FITNESS FOR A PARTICULAR PURPOSE.  See the GNU
% General Public License for more details.

% You should have received a copy of the GNU General Public License
% along with this program; if not, write to the Free Software
% Foundation, Inc., 51 Franklin Street, Fifth Floor, Boston, MA 02110-1301, USA.
%

%%

t = linspace(0,2,1000);
x = trimf(t,[0 1 2]);

%%

figure(1); clf;
set(gcf,'Color',[1 1 1]);

subplot(3,1,1);
plot(t,x);

n = length(t);
T = 2;
ts = T/n;
fs = 1/ts;

f = linspace(0,fs,n);
y = fft(x)./n;

xlabel('$t$ [s]');
ylabel('$x(t)$');

set(gca,'YTick',[0 0.5 1]);
set(gca,'YTickLabel',{'0';'Xm/2';'Xm'});

legend('Time-domain $x(t)$');
legend boxoff;

subplot(3,1,2);

stem(f, abs(y),'red', 'MarkerSize',4,'MarkerFaceColor','red');

xlim([0 10]);
ylim([0 0.5]);

xlabel('$f$ $[\mbox{s}^{-1}]$');
ylabel('$|\mathcal{F}\{x\}(f)|$');

set(gca,'YTick',[0 0.25 0.5]);
set(gca,'YTickLabel',{'0';'Xm/2';'Xm/4'});

legend('Fourier transform: magnitude');
legend boxoff;

subplot(3,1,3);

stem(f, angle(y),'green', 'MarkerSize',4,'MarkerFaceColor','green');

xlim([0 10]);
ylim([-pi pi]);

set(gca,'YTick',[-pi -pi/2 0 pi/2 pi]);
set(gca,'YTickLabel',{'-pi';'-pi/2';'0';'pi/2';'pi'});

xlabel('$f$ $[\mbox{s}^{-1}]$');
ylabel('$\arg \mathcal{F}\{x\}(f)$');

legend('Fourier transform: phase');
legend boxoff;

%%

figure(2); clf;
set(gcf,'Color',[1 1 1]);

subplot(3,1,1);
plot(t,x);

n = length(t);
T = 2;
ts = T/n;
fs = 1/ts;

f = linspace(0,fs,n);
y = fft(x)./n;

xlabel('$t$ [s]');
ylabel('$x(t)$');

set(gca,'XTick',0:0.2:2);
set(gca,'YTick',[0 0.5 1]);
set(gca,'YTickLabel',{'$0$';'$\displaystyle\frac{X_m}{2}$';'$X_m$'});

legend('Time-domain $x(t)$');
legend boxoff;

plotTickLatex2D('xlabeldy',0.02);

subplot(3,1,2);

stem(f, abs(y),'red', 'MarkerSize',4,'MarkerFaceColor','red');

xlim([0 10]);
ylim([0 0.5]);

xlabel('$f$ $[\mbox{s}^{-1}]$');
ylabel('$|\mathcal{F}\{x\}(f)|$');

set(gca,'YTick',[0 0.25 0.5]);
set(gca,'YTickLabel',{'$0$';'$\displaystyle\frac{X_m}{4}$';'$\displaystyle\frac{X_m}{2}$'});

legend('Fourier transform: magnitude');
legend boxoff;

plotTickLatex2D('xlabeldy',0.02);

subplot(3,1,3);

stem(f, angle(y),'green', 'MarkerSize',4,'MarkerFaceColor','green');

xlim([0 10]);
ylim([-pi pi]);

set(gca,'YTick',[-pi -pi/2 0 pi/2 pi]);
set(gca,'YTickLabel',{'$-\pi$';'$-\displaystyle\frac{\pi}{2}$';'$0$';'$\displaystyle\frac{\pi}{2}$';'$\pi$'});

xlabel('$f$ $[\mbox{s}^{-1}]$');
ylabel('$\arg \mathcal{F}\{x\}(f)$');

legend('Fourier transform: phase');
legend boxoff;

plotTickLatex2D('xlabeldy',0.02);
