# Supplementary material for: Feature Selection Combined with Neural Network Structure Optimization for HIV-1 Protease Cleavage Site Prediction
Source: Biomed Res Int. 2015 Apr 15;2015:263586. doi: 10.1155/2015/263586 (PMC4413510; doi:10.1155/2015/263586)
Supplement: Supplementary file 1 — The document covers the design of the feature selection method combined with neural network structure optimization. Meanwhile, this document contains the feature extraction of traditional orthogonal encoding features, PCA and NLF based features. Combination fusion and decision fusion method based on these features aim to get comprehensive feature representation and improve prediction performance are listed in the document. [file 263586.f1.zip › Optional Supplementary Materials/OE Feature extraction code/Net_Train.m]

function [net Correct_Rate_Temp Val_Condition Val_Error_Temp x x1 x2 x3 x4 x5 x6] = Net_Train( Data_Train, Label_Train,...
    Data_Val, Label_Val, Num_Val, NodeNum_hide, NN_epochs, Retraining, T, l, Train_Error_Evaluation, Features_Step,Epochs_Num, Features_Num, Hide_Node_Num, Train_Error_All, Correct_Rate_All, Val_Error_All)
%ÑµÁ·Éñ¾­ÍøÂçµÄº¯Êý
%ÊäÈë£ºnet ÒªÑµÁ·µÄÍøÂç£¬Data_Train ÑµÁ·Ñù±¾£¬Label_Train ÑµÁ·Ñù±¾Àà±êºÅ£¬ Data_Val ÑéÖ¤Ñù±¾£¬
%Label_Val ÑéÖ¤Ñù±¾Àà±êºÅ£¬ Num_Val ÑéÖ¤Ñù±¾¸öÊý£¬ Train_Error_Save ±£´æÑµÁ·Îó²î£¬
%Val_Error_Save ±£´æÑéÖ¤Îó²î£¬ Correct_Rate_Save ±£´æÑéÖ¤Ñù±¾·ÖÀà×¼È·ÂÊ£¬ NN_epochs µü´úÊý
%Êä³ö£º
%2012.1.13 written by Jason.
% global Epochs_Num
% global Features_Num
% global Hide_Node_Num
% global Train_Error_All
% global Correct_Rate_All
Correct_Rate_Temp = zeros(1,100);
Val_Error_Temp = zeros(1,100);%´æ´¢ÑéÖ¤Îó²î
Val_Condition = 0;
net = newff(minmax(Data_Train),Label_Train',NodeNum_hide,{'tansig' 'tansig'},'trainlm');%ÐÂ½¨ÍøÂç

% net.layers{1}.initFcn = 'initwb'; 
% net.inputWeights{1,1}.initFcn = 'rands';
% [row1,column1] = size(net.b{1});
% net.b{1} = ones(row1,column1);
% 
% net.layers{2}.initFcn = 'initwb'; 
% net.layerWeights{2,1}.initFcn = 'rands';
% [row2,column2] = size(net.b{2});
% net.b{2} = ones(row2,column2);
% 
% net = init(net);

%ÑµÁ·
e = Retraining;%ÅÐ¶ÏÊÇ·ñ½øÐÐÔÙÑµÁ·µÄãÐÖµ
net.trainParam.epochs = NN_epochs; % Maximum number of epochs to train
net.trainParam.goal = 1.0e-20;
net.trainParam.min_grad = 1.0e-20;
net.trainParam.time = inf;
net.trainParam.max_fail = inf;
net.trainParam.mu_max = 1.0e10;
net.divideParam.trainRatio = 1;%½«Ñù±¾¶¼·ÖÎªÑµÁ·¼¯
net.divideParam.valRatio = 0;
net.divideParam.testRatio = 0;
net.trainParam.lr =0.05;
net.trainParam.mc = 0.8;
%net.divideFcn ='';%¸ÃÉèÖÃÒ²¿ÉÒÔÊµÏÖ²»×Ô¶¯·Ö×é
xxx = size(Data_Train);
yyy = xxx(1);
for r = 1:16
    if yyy > Features_Step(r) && yyy <= Features_Step(r + 1)
        Train_Temp = Train_Error_Evaluation(r);
    end
end
x1 = Epochs_Num;
x2 = Features_Num;
x3 = Hide_Node_Num;
x4 = Train_Error_All;
x5 = Correct_Rate_All;
x6 = Val_Error_All;
x = 0;
while x < 11
    x = x + 1;
    j = 1;
    Epochs_Num_temp = [];
    Train_Error_All_temp = [];
    Correct_Rate_All_temp = [];
    Features_Num_temp = [];
    Hide_Node_Num_temp = [];
    Val_Error_All_temp = [];
    while 1
        [ net,  Train_Record ] = train( net,   Data_Train,   Label_Train' );
        Train_Error = Train_Record.perf( end ); %È¡ÑµÁ·¹ý³ÌÖÐ×îºóÒ»´Îµü´úµÄÑµÁ·Îó²î
        [Label_Val_Out,  aaa, bbb, ccc,  Val_Error] = sim(net,  Data_Val, '', '',  Label_Val');
        Label_Val_Class = zeros(Num_Val,1);%´æ´¢Éñ¾­ÍøÂçÊä³öÖµ¾­¹ýÁ¿»¯ºóµÃµ½µÄÀà±êºÅ
        %ÒÀ¾ÝÊä³öµÄÕý¸ºÅÐ¶ÏÀà±ð
        Label_Temp =  Label_Val_Out >= 0.3;                        %%%%×¢Òâ
        Label_Val_Class( Label_Temp ) = 1;
        Label_Temp =  Label_Val_Out < 0.3;
        Label_Val_Class( Label_Temp ) = 0;
        Class_Correct = find(Label_Val_Class == Label_Val);                %×¢Òâ
        Correct_Rate = length(Class_Correct) / Num_Val * 100;
        Correct_Rate_Temp(j) = Correct_Rate;
        Val_Error_Temp(j) = Val_Error;
        
        %±£´æÖÐ¼ä½á¹û
        Epochs_Num_temp = [Epochs_Num_temp j];
        Features_Num_temp(j) = yyy;
        Hide_Node_Num_temp(j) = NodeNum_hide;
        Train_Error_All_temp(j) = Train_Error;
        Correct_Rate_All_temp(j) = Correct_Rate;
        Val_Error_All_temp(j) = Val_Error;
        %ÑéÖ¤Îó²îÅÐ¶ÏÌØÕ÷Ñ¡Ôñ¹ý³ÌÊÇ·ñ½áÊø
        Val_Error_Tempp = Val_Error_Temp(1:j);%È¡µ±Ç°ÑµÁ·³öµÄÍøÂçµÄÑéÖ¤Îó²î
        Val_Error_Len = length(Val_Error_Tempp);
        if Val_Error_Len > T
            Val_Temp = Val_Error_Tempp( Val_Error_Len - T : Val_Error_Len );
            Val_Tempp = Val_Temp( 1 : length(Val_Temp) ) - Val_Temp(1);
            Val_Temppp = Val_Tempp(2 : length(Val_Temp));
            Val_Tempppp = length( find(Val_Temppp > l) );
            if Val_Tempppp == T
                Val_Condition = 1;
                break;
            end
        end
        %ÑµÁ·½áÊøµÄÌõ¼þ
        if j > 1 %ÎªÁË½øÐÐ±È½ÏÒªÏÈ½øÐÐÒ»´ÎÑµÁ·£¬j×÷Îª½øÐÐÔÙÑµÁ·µÄÌõ¼þ
            Train_Error_Temp2 = Train_Error;
            Train_Error_Tempp = Train_Error_Temp1 - Train_Error_Temp2;
            if Train_Error_Tempp < e    %Ïà¶ÔÎó²î  ¸Ä£¡
                break;
            end
        end
        Train_Error_Temp1 = Train_Error;
        j = j+1;
    end
    Correct_Rate_Temp_Effect = Correct_Rate_Temp == 0;
    Correct_Rate_Temp(Correct_Rate_Temp_Effect) = [];
    Val_Error_Temp_Effect = Val_Error_Temp == 0;
    Val_Error_Temp(Val_Error_Temp_Effect) = [];
    if Train_Error < Train_Temp
        
        %¸üÐÂÖÐ¼ä½á¹û
        x1 = [x1 Epochs_Num_temp + Epochs_Num(end)];
        x2 = [x2 Features_Num_temp];
        x3 = [x3 Hide_Node_Num_temp];
        x4 = [x4 Train_Error_All_temp];
        x5 = [x5 Correct_Rate_All_temp];        
        x6 = [x6 Val_Error_All_temp]; 
        break
    end
end
end
