# Supplementary material for: Feature Selection Combined with Neural Network Structure Optimization for HIV-1 Protease Cleavage Site Prediction
Source: Biomed Res Int. 2015 Apr 15;2015:263586. doi: 10.1155/2015/263586 (PMC4413510; doi:10.1155/2015/263586)
Supplement: Supplementary file 1 — The document covers the design of the feature selection method combined with neural network structure optimization. Meanwhile, this document contains the feature extraction of traditional orthogonal encoding features, PCA and NLF based features. Combination fusion and decision fusion method based on these features aim to get comprehensive feature representation and improve prediction performance are listed in the document. [file 263586.f1.zip › Optional Supplementary Materials/PCA Feature extraction code/NN_FS_Main_Test.m]

tic;
clear all
close all
load Features.mat
load Label.mat
%% Êý¾Ý´¦Àí
Data_Temp = mapminmax(data9',0,1);%×¢ÒâÊäÈë¾ØÕó£¬Êý¾Ý±ê×¼»¯£º×îÐ¡ÖµÎª-1£¬×î´óÖµÎª1
% Data_Temp = data9';
[Sample_Num d] = size(Data_Temp');%Ñù±¾¸öÊýºÍÌØÕ÷Î¬Êý
%Àà±êºÅ
% Label_Indices = find(Label == 0);%½«0Àà±êÎª-1
% Label(Label_Indices) = -1;
%Ëæ»ú·ÖÅäÑµÁ·¼¯¡¢ÑéÖ¤¼¯ºÍ²âÊÔ¼¯¡£
%!!!!×¢Òâ!!!!ÊäÈë¾ØÕó
[aaa,bbb,ccc, trainInd, valInd, testInd] = dividerand(Data_Temp, 0.6, 0.4, 0);
Num_Train = length(trainInd);
Num_Val = length(valInd);
Num_Test = length(testInd);
%% Ïà¹ØÐÔ
%¼ÆËãÑµÁ·Êý¾ÝµÄÏà¹ØÐÔ£¬²¢¸ù¾ÝÏà¹ØÐÔ½«ÌØÕ÷¼¯·ÖÎªÁ½²¿·Ö£ºSºÍD
Indices_Sites = Sites_Collocate( Data_Temp' );%×¢ÒâÊäÈë¾ØÕó
% load Data_Cor_Rank.mat
% load Indices_Cor.mat
% D = Indices_Cor(1:d/2,:);
% S = Indices_Cor(d/2+1:d,:);
D = Indices_Sites;
%% ÌØÕ÷Ñ¡Ôñ
%ÌØÕ÷¼¯³õÊ¼»¯
D_Chosen = zeros(1,d);
D_Chosen(1) = D(1);
D_Chosen_Index = D_Chosen > 0;
Features_Chosen = D_Chosen(D_Chosen_Index);%Ñ¡³öµÄÌØÕ÷×Ó¼¯
Features_Chosen_Num = length( Features_Chosen );%ÌØÕ÷×Ó¼¯Î¬Êý
D_Remain = D;%D¼¯ºÏÊ£ÓàÌØÕ÷¼¯
D_Remain(1) = [];
D_Remain_Num = length( D_Remain );
% Éñ¾­ÍøÂç²ÎÊý³õÊ¼»¯
NodeNum_hide = 1;
NN_epochs = 10;
Retraining = 0.00001;%ÅÐ¶ÏÊÇ·ñ½øÐÐÔÙÑµÁ·µÄãÐÖµ
%ÅÐ¶ÏÑµÁ·½á¹ûºÃ»µµÄ±ê×¼
Train_Error_Evaluation = [0.22 0.205 0.2 0.185 0.17 0.145 0.115 0.095...
                          0.06 0.04 0.025 0.02 0.015 0.01 0.005 0.003];
Features_Step = [0 10 20 30 40 50 60 70 80 90 100 110 120 130 140 150 160];
%ÌØÕ÷Ñ¡Ôñ¹ý³Ì½áÊøÌõ¼þ£ºÑéÖ¤Îó²îºÍ×¼È·ÂÊ
l = 0.15;%ÑéÖ¤Îó²îãÐÖµ
T = 3;%ÑéÖ¤Îó²îÔö³¤´ÎÊýãÐÖµ
m = 0;%ÌØÕ÷ÆÀ¼Û²ÎÊý£º×¼È·ÂÊãÐÖµ
c = 0.05;%×¼È·ÂÊÍ£Ö¹Ìõ¼þãÐÖµ
M = 50;%ÑéÖ¤×¼È·ÂÊÔö³¤´ÎÊýãÐÖµ
Correct_Rate_Stop = 0;
%ÌØÕ÷Ñ¡Ôñ¹ý³Ì¸ú×Ù
global Epochs_Num;
global Features_Num;
global Hide_Node_Num;
global Train_Error_All;
global Correct_Rate_All;
global Val_Error_All;
Epochs_Num = [];
Features_Num = [];
Hide_Node_Num =[];
Train_Error_All = [];
Correct_Rate_All = [];
Val_Error_All = [];

%ÓÃ³õÊ¼ÌØÕ÷×Ó¼¯½øÐÐÑµÁ·
Data = Data_Temp(Features_Chosen,:);
Data_Train = Data(:,trainInd);
Data_Val = Data(:,valInd);
Data_Test = Data(:,testInd);
Label_Train = Label(trainInd);
Label_Val = Label(valInd);
Label_Test = Label(testInd);
%ÑµÁ·Éñ¾­ÍøÂç
Epochs_Num = [0];
[net Correct_Rate_Temp Val_Condition Val_Error_Temp x Epochs_Num Features_Num Hide_Node_Num Train_Error_All Correct_Rate_All Val_Error_All] = Net_Train( Data_Train,Label_Train,...
    Data_Val, Label_Val, Num_Val, NodeNum_hide, NN_epochs, Retraining, T, l, Train_Error_Evaluation, Features_Step, Epochs_Num, Features_Num, Hide_Node_Num, Train_Error_All, Correct_Rate_All, Val_Error_All);
plot(Correct_Rate_Temp);
Correct_Rate_Save = Correct_Rate_Temp(end);%´æ´¢ÑéÖ¤×¼È·ÂÊ
Epochs_Num(1) = [];
%¿ªÊ¼ÌØÕ÷Ñ¡Ôñ¹ý³Ì
counter = 1;
while 1
    fprintf('counter %d\n',  counter);
    if D_Remain_Num > 0
        Feature_D_Add = D_Remain(1);  %µ±Ç°Òª´ÓD¼¯ºÏ¼ÓÈëµÄÌØÕ÷ ¿¼²ìÌØÕ÷
        Features_Chosen_Temp = [ Features_Chosen   Feature_D_Add ]; %µ±Ç°ÁÙÊ±µÃµ½µÄÌØÕ÷×Ó¼¯
        Data = Data_Temp(Features_Chosen_Temp,:);
        %½«Ñù±¾·ÖÎªÑµÁ·¼¯¡¢ÑéÖ¤¼¯¡¢²âÊÔ¼¯
        Data_Train = Data(:,trainInd);
        Data_Val = Data(:,valInd);
        Data_Test = Data(:,testInd);
        Label_Train = Label(trainInd);
        Label_Val = Label(valInd);
        Label_Test = Label(testInd);
        %ÑµÁ·Éñ¾­ÍøÂç
        [net Correct_Rate_Temp Val_Condition Val_Error_Temp x Epochs_Num Features_Num Hide_Node_Num Train_Error_All Correct_Rate_All Val_Error_All] = Net_Train( Data_Train,Label_Train,...
            Data_Val, Label_Val, Num_Val, NodeNum_hide, NN_epochs, Retraining, T, l, Train_Error_Evaluation, Features_Step,Epochs_Num, Features_Num, Hide_Node_Num, Train_Error_All, Correct_Rate_All, Val_Error_All);
        hold off
        plot(Correct_Rate_Temp);
        %±£´æµ±Ç°ÑµÁ·ÍøÂç
        Net_Save = net;
        %ÅÐ¶ÏÌØÕ÷Ñ¡Ôñ¹ý³ÌÊÇ·ñ½áÊø
        if Val_Condition == 1
            break;
        end
        %ÅÐ¶ÏÐÂ¼ÓÈëÌØÕ÷µÄÓÐÐ§ÐÔ
        [ Condition ] = Feature_Evaluation(Correct_Rate_Save, Correct_Rate_Temp, m, x);
        if Condition == 1 %Èç¹ûÌØÕ÷ÐÂ¼ÓÈëÓÐÐ§£¬Ôò½«Æä¼ÓÈëÌØÕ÷×Ó¼¯ ²¢¸üÐÂ´ýÑ¡¼¯ºÍÌØÕ÷¸öÊý
            D_Chosen_Effect = find(D_Chosen ~= 0);
            D_Chosen(length(D_Chosen_Effect) + 1) = Feature_D_Add;
            D_Remain(1) = [];
            D_Remain_Num = D_Remain_Num - 1;
            D_Chosen_Index = find(D_Chosen~= 0);
            Features_Chosen = D_Chosen(D_Chosen_Index);%Ñ¡³öµÄÌØÕ÷×Ó¼¯
            Features_Chosen_Num = length( Features_Chosen );
            Correct_Rate_Save = [ Correct_Rate_Save Correct_Rate_Temp(end) ];
        else
            if NodeNum_hide < 13
            NodeNum_hide = NodeNum_hide + 1;%Ôö¼ÓÒ»¸öÒþ²Ø½áµã
            end
            % Éñ¾­ÍøÂç
            [net Correct_Rate_Temp Val_Condition Val_Error_Temp x Epochs_Num Features_Num Hide_Node_Num Train_Error_All Correct_Rate_All Val_Error_All] = Net_Train( Data_Train,Label_Train,...
                Data_Val, Label_Val, Num_Val, NodeNum_hide, NN_epochs, Retraining, T, l, Train_Error_Evaluation, Features_Step,Epochs_Num, Features_Num, Hide_Node_Num, Train_Error_All, Correct_Rate_All, Val_Error_All);
            hold off
            plot(Correct_Rate_Temp);
            %±£´æÍøÂç
            Net_Save = net;
            %ÅÐ¶ÏÌØÕ÷Ñ¡Ôñ¹ý³ÌÊÇ·ñ½áÊø
            if Val_Condition == 1
                break;
            end
            [ Condition ] = Feature_Evaluation(Correct_Rate_Save, Correct_Rate_Temp, m, x);
            if Condition == 1 %Èç¹ûÔö¼Ó½áµãÓÐÐ§£¬Ôò½«Æä¼ÓÈëÌØÕ÷×Ó¼¯         ²¢¸üÐÂ´ýÑ¡¼¯ºÍÌØÕ÷¸öÊý
                D_Chosen_Effect = find(D_Chosen > 0);
                D_Chosen(length(D_Chosen_Effect) + 1) = Feature_D_Add;
                D_Remain(1) = [];
                D_Remain_Num = D_Remain_Num - 1;
                D_Chosen_Index = find(D_Chosen~= 0);
                Features_Chosen = D_Chosen(D_Chosen_Index);%Ñ¡³öµÄÌØÕ÷×Ó¼¯
                Features_Chosen_Num = length( Features_Chosen );
                Correct_Rate_Save = [ Correct_Rate_Save Correct_Rate_Temp(end) ];
                %ÓÃÑéÖ¤×¼È·ÂÊÅÐ¶ÏÌØÕ÷Ñ¡Ôñ¹ý³ÌÊÇ·ñÍ£Ö¹
                Correct_Rate_Save_Len = length(Correct_Rate_Save);
                if Correct_Rate_Save_Len > M
                    Temp = Correct_Rate_Save( (Correct_Rate_Save_Len-M) : end );
                    Tempp = Temp(2:end) - Temp(1);
                    Temppp = length( find(Tempp < c) );
                    if Temppp == M
                        Correct_Rate_Stop = 1;
                        break;
                    end
                end
            else %Èç¹ûÔö¼Ó½áµãÒ²²»ÄÜÌá¸ßÐ§¹û£¬Ôò»Ö¸´Ô­À´µÄÍøÂç£¬²¢´ÓS¼¯ÖÐÑ¡È¡ÌØÕ÷
                NodeNum_hide = NodeNum_hide - 1;%»Ö¸´Ô­À´µÄ½áµãÊý
                D_Remain(1) = [];
                D_Remain_Num = D_Remain_Num - 1;
                
            end
        end
    else
        break
    end
    counter = counter +1;
end
toc;
