# Supplementary material for: Feature Selection Combined with Neural Network Structure Optimization for HIV-1 Protease Cleavage Site Prediction
Source: Biomed Res Int. 2015 Apr 15;2015:263586. doi: 10.1155/2015/263586 (PMC4413510; doi:10.1155/2015/263586)
Supplement: Supplementary file 1 — The document covers the design of the feature selection method combined with neural network structure optimization. Meanwhile, this document contains the feature extraction of traditional orthogonal encoding features, PCA and NLF based features. Combination fusion and decision fusion method based on these features aim to get comprehensive feature representation and improve prediction performance are listed in the document. [file 263586.f1.zip › Optional Supplementary Materials/PCA Feature extraction code/Sites_Collocate.m]

% function Indices_Sites = Sites_Collocate( Data )
% %ÊäÈëÊý¾ÝDataµÄÒ»ÐÐÎªÒ»¸öÑù±¾
% [p d] = size(Data);%pÎªÑµÁ·Ñù±¾¸öÊý
% Length = d/8;
% Temp = 1:Length;
% Indices = zeros(8,Length);
% Indices_Cor = zeros(8,Length);
% for i = 1:8
%     Indices(i,:) = Temp + Length * (i-1);
%     [Data_Cor_Rank Indices_Cor(i,:)] = Compute_Correlation( Data(:,Indices(i,:)) );
%     Indices_Cor(i,:) = Indices_Cor(i,:) + Length * (i-1);
% end
% Indices_Sites = [Indices_Cor(4,:) Indices_Cor(5,:) Indices_Cor(3,:) Indices_Cor(6,:) Indices_Cor(2,:) Indices_Cor(7,:)...
%                  Indices_Cor(1,:) Indices_Cor(8,:)];
% % end
function Indices_Sites = Sites_Collocate( Data )
%ÊäÈëÊý¾ÝDataµÄÒ»ÐÐÎªÒ»¸öÑù±¾
[p d] = size(Data);%pÎªÑµÁ·Ñù±¾¸öÊý
Length = d/8;
Indices = zeros(4,2*Length);
Indices_Cor = zeros(4,2*Length);
for i = 1:4    
    Indices(i,1:Length) =  ((3*Length+1) - (i-1)*Length) : ((3*Length) - (i-2)*Length);
    Indices(i,(Length+1):(2*Length)) =  ((3*Length+1) + i*Length): ((3*Length) + (i+1)*Length) ;     
    [Data_Cor_Rank Indices_Cor(i,:)] = Compute_Correlation( Data(:,Indices(i,:)) );
    for j = 1:(2*Length)
        if Indices_Cor(i,j) > Length
            Indices_Cor(i,j) = Indices_Cor(i,j) + (3*Length) + (i-1)*Length;
        else
            Indices_Cor(i,j) = Indices_Cor(i,j) + (3*Length) - (i-1)*Length;
        end
    end
end
Indices_Sites = [ Indices_Cor(1,:) Indices_Cor(2,:) Indices_Cor(3,:) Indices_Cor(4,:) ];
end
